1 **Interplay between positive and negative regulation by B3-type transcription**  
2 **factors is critical for the accurate expression of the *ABA INSENSITIVE 4***  
3 **gene.**

4  
5 Alma Fabiola Hernández-Bernal<sup>1</sup>, Elizabeth Cordoba<sup>1</sup>, Mónica Santos Mendoza,  
6 Kenny Alejandra Agreda-Laguna<sup>1</sup>, Alejandra Dagmara Rivera<sup>1</sup>, Maritere  
7 Uriostegui-Arcos<sup>2</sup>, Mario Zurita<sup>2</sup> and Patricia León<sup>1\*</sup>  
8 Departamento de Biología Molecular de Plantas<sup>1</sup>, Departamento de Genética del  
9 Desarrollo y Fisiología Molecular<sup>2</sup> Instituto de Biotecnología, Universidad Nacional  
10 Autónoma de México, Av. Universidad # 2001, Col. Chamilpa, Cuernavaca,  
11 Morelos, México, C.P. 62210.

12  
13 \*Correspondence: Patricia León  
14 email: [patricia@ibt.unam.mx](mailto:patricia@ibt.unam.mx)

15  
16 **Running title:** A B3-type transcription factor circuit defines the correct *ABI4*  
17 expression.

18 **Key words:** ABI4; LEC1; LEC2; ABI3; VAL1/HSI2; HSL1; seed development; early  
19 seedling development; sugar responses, ABA responses.

20  
21  
22  
23 The author(s) responsible for distribution of materials integral to the findings  
24 presented in this article in accordance with the policy described in the Instructions  
25 for Authors (<https://academic.oup.com/plcell/pages/General-Instructions>) is (are):  
26 John D. Author ([author@college.edu](mailto:author@college.edu)).  
27

28

29 **ABSTRACT**

30 The ABA-INSENSITIVE 4 transcription factor is key for the regulation of diverse  
31 aspects of plant development and environmental responses, including proper  
32 perception of hormonal and nutritional signals. ABI4 activity is highly regulated at  
33 the transcriptional and post-transcriptional levels leading to precise expression  
34 mainly in the developing seed and early seedling development. Based on genetic  
35 and molecular approaches in the current study we provide new insights into the  
36 central mechanism underpinning the transcriptional regulation of *ABI4* during both  
37 seed and vegetative development. We identified a complex interplay between the  
38 LEC2 and ABI3 transcriptional activators and the HSI/VAL repressors that is critical  
39 for proper *ABI4* expression. Interestingly, the regulation by these proteins relies on  
40 the two RY *cis*-acting motifs present two kb upstream of the *ABI4* gene. Our  
41 analysis also shows that the chromatin landscape of the *ABI4* loci is highly  
42 dependent on the LEC2 and HSI2/VAL proteins. LEC2 regulation extends to the  
43 vegetative development and the absence of this factor results in ABA- and sugar-  
44 insensitive signaling in the developing plant. This regulatory circuit functions as a  
45 major control module for the correct spatial-temporal expression of *ABI4* and  
46 prevents its ectopic accumulation that is harmful to the plant.

47

48

49

## 50 INTRODUCTION

51 The transcriptional factor ABA-INSENSITIVE 4 (ABI4) is a member of the  
52 APETALA-2 (AP2)/ERF gene family, and is conserved in plants (Wind et al., 2013).  
53 ABI4 plays essential roles integrating nutritional, hormonal, abiotic, biotic and  
54 developmental signals (Chandrasekaran et al., 2020). However, ABI4 is a versatile  
55 regulator, required for abscisic acid (ABA) signaling and proper interaction with  
56 gibberellins (GA) and auxins during seed maturation, germination and post-  
57 germinative growth (Soderman et al., 2000; Shkolnik-Inbar and Bar-Zvi, 2010;  
58 Huang et al., 2017). ABI4 is also essential for sugar perception, nitrate sensitivity  
59 and ABA-dependent lipid mobilization in the embryo (Arenas-Huertero et al., 2000;  
60 Huijser et al., 2000; Rook et al., 2001; Signora et al., 2001; Penfield et al., 2006).  
61 Mutants of ABI4 are tolerant to salt (Quesada et al., 2000) and display defects in  
62 redox homeostasis (Kerchev et al., 2011). Finally, ABI4 regulate lateral root  
63 initiation (Shkolnik-Inbar and Bar-Zvi, 2010), male sterility and mitochondria- and  
64 chloroplast- retrograde communications (Koussevitzky et al., 2007; Giraud et al.,  
65 2009).

66 ABI4 affects the expression of diverse genes, acting as both a positive and a  
67 negative regulator by interacting with the CE1 (CACCG) sequence and related *cis*-  
68 acting elements (Niu et al., 2002; Acevedo-Hernandez et al., 2005; Koussevitzky et  
69 al., 2007; Wind et al., 2013). ABI4 induces the expression of genes such as the  
70 starch branching enzyme (*SBE2*) and the transcriptional factor *ABI5* in the  
71 presence of sugars (Bossi et al., 2009). In response to ABA, ABI4 also upregulates  
72 the expression of genes involved in ABA biosynthesis and GA catabolism, such as  
73 *NCED6* and *GA2ox7* (Shu et al., 2016b), in lipid catabolism, as oleosin and  
74 dehydrin (Penfield et al., 2006; Yang et al., 2011), and the flower transition gene  
75 *FLOWERING LOCUS C (FLC)* (Shu et al., 2016a) and *PHYTOCHROME A*  
76 (*PHYA*) (Barros-Galvao et al., 2020). In contrast to transcriptional activation, ABI4  
77 represses the expression of diverse photosynthetic-related genes (PhANGS), the  
78 cytokinin response regulators (ARRs) and some genes involved in ethylene  
79 biosynthesis (Koussevitzky et al., 2007; Dong et al., 2016; Huang et al., 2016a).

80 Recently, *ABI4* has been shown to downregulate the *VTC2* gene that is required  
81 for plant defense responses (Yu et al., 2019).

82 The accumulation and activity of *ABI4* is tightly controlled at the  
83 transcriptional and protein levels. At the protein level *ABI4* is subjected to selective  
84 degradation via proteasome (Finkelstein et al., 2011; Gregorio et al., 2014) and its  
85 activity is modulated through by MAP kinase phosphorylation in response to  
86 sugars, ABA and salt stresses (Eisner et al., 2021). At the transcriptional level,  
87 *ABI4* is expressed predominately in the developing seed during germination and in  
88 the first days of the seedling development (Soderman et al., 2000; Penfield et al.,  
89 2006; Bossi et al., 2009). Later in development, the expression of *ABI4* is restricted  
90 to specific regions such as the vascular system of the petiole, pollen and the  
91 mature zone of the root (Shkolnik-Inbar and Bar-Zvi, 2010). Finally, the expression  
92 of *ABI4* is activated by environmental signals such as ABA and high sugar levels  
93 (Arroyo et al., 2003).

94 A central regulator of *ABI4* is the *ABI4* protein itself, functioning as an  
95 activator to maintain its correct temporal-spatial transcription during early seedling  
96 development (Bossi et al., 2009). Other positive regulators that dictate the correct  
97 expression of *ABI4* in the germinating seed include the transcription factors  
98 MYB96, WRKY6 and the chloroplast envelope bound PTM (Sun et al., 2011; Lee  
99 et al., 2015; Huang et al., 2016b). The expression of *ABI4* is also downregulated by  
100 several factors including SCARECROW, WRKY18/40/60, RAV1 in the root apical  
101 meristem and BASS2 in the germinating seedlings (Shang et al., 2010; Cui et al.,  
102 2012; Feng et al., 2014; Zhao et al., 2016).

103 In spite that a major location of *ABI4* expression is in the developing  
104 embryo, the regulators responsible for its spatial and temporal expression remain  
105 elusive. The accumulation of *ABI4* overlaps with that of the LAF1 regulators of  
106 seed development, which include LEAFY COTYLEDON 1 (*LEC1*), *LEC2*, *FUSCA3*  
107 (*FUS3*) and the ABA-INSENSITIVE 3 (*ABI3*) transcription factors (Le et al., 2010;  
108 Boulard et al., 2017; Lepiniec et al., 2018). *LEC1* shares sequence similarity with  
109 the HAP3 subunit of the CCAAT-binding transcription factor and is a member of the  
110 NF-YB family (Lotan et al., 1998). In contrast, *LEC2*, *ABI3* and *FUS3* belong to the

111 plant-specific B3-domain family (ALF), related to the maize VP1 protein (Stone et  
112 al., 2001). The LAFL regulators work in an intricate network and are essential for  
113 the regulation of key proteins required for the correct seed maturation and  
114 germination, embryonic identity, somatic embryogenesis, the acquisition of  
115 desiccation tolerance and dormancy, specification of the cotyledon identity and  
116 hormone signaling (Meinke et al., 1994; Santos-Mendoza et al., 2008; Tao et al.,  
117 2017; Lepiniec et al., 2018; Wang et al., 2020). Accordingly, mutants of the LAFL  
118 genes display diverse homeotic alterations, such as the acquisition of vegetative  
119 characters in the embryonic tissues (presence of trichomes in cotyledons) and  
120 precocious germination (Meinke et al., 1994; Lotan et al., 1998).

121         The mechanism of action of these regulators is diverse. For example, LEC1  
122 acts as a pioneer transcriptional regulator promoting an active chromatin state  
123 activating transcription of the *FLC* gene (Tao et al., 2017). In contrast, LEC2 and  
124 FUS3 have been shown to activate the expression of various genes by displacing  
125 negative regulators, such as the *HIGH LEVEL EXPRESSION OF SUGAR*  
126 *INDUCIBLE GENE 2/VIVIPAROUS1/ABI3-LIKE 1 (HSI2/VAL1)* or *HSI2-*  
127 *LIKE1/VAL2 (HSL1/VAL2)* proteins, two members of the B3-type family that act as  
128 central repressors of diverse seed developmental genes. These proteins interact  
129 with the same *cis*-acting sequences as the ALF (Tsukagoshi et al., 2007; Tao et  
130 al., 2019).

131 Previous studies showed that genetic interactions between ABI3, LEC1 and FUS3  
132 with ABI4 in responses to ABA, sugar perception and development (Soderman et  
133 al., 2000; Brocard-Gifford et al., 2003). However, the molecular nature underlying  
134 these interactions remains unclear, since yeast two-hybrid analysis did not show  
135 direct interaction, nor that the level of the *ABI4* transcript was significantly altered in  
136 the *lec1* or *fus3* mutant backgrounds (Soderman et al., 2000; Brocard-Gifford et al.,  
137 2003).

138         Due to the role of ABI4 as an integrator of diverse signals, understanding  
139 the mechanisms that regulate its accumulation under diverse developmental and  
140 environmental conditions is important. In the present study using genetic and  
141 molecular analyses we show that several of the LAFL transcription factors are

142 required to maintain the level and the correct expression pattern of *ABI4*. We  
143 identify LEC2 and ABI3 as critical direct activators of *ABI4* expression during seed  
144 development and early vegetative growth. Furthermore, our analysis uncovered an  
145 unexpected function of the HSI2/VAL1 as a major repressor of *ABI4* expression in  
146 vegetative tissues. The interplay between activation and repression exerted by  
147 these regulators occurs through the same *cis*-acting sequences and is essential for  
148 the correct expression of *ABI4* and its response to environmental signals such as  
149 sugar and ABA levels.

150

151

152

## 153 **RESULTS**

154

### 155 **ABI4 expresses during all stages of the developing seed.**

156         During seed development, the expression of *ABI4* is restricted to the embryo  
157 (Soderman et al., 2000; Bossi et al., 2009). To obtain a detailed picture of the *ABI4*  
158 expression profile at different stages of the developing seed, we analyzed the b-  
159 glucuronidase (GUS) activity of the *pABI4:GUS* transgenic line containing 3Kb of  
160 the *ABI4* regulatory region, which was previously shown to accurately reflect the  
161 expression of the endogenous transcript (Bossi et al., 2009). As shown in Figure  
162 1A, we confirmed that *ABI4* expression restricts to the embryo proper and is  
163 detected at the pre-globular stage and in all the following developmental stages,  
164 except for the dry seeds as previously reported (Bossi et al., 2009).

165         Previous research demonstrated that ABI4 is an essential activator of its  
166 own expression during germination and early seedling development (Bossi et al.,  
167 2009). In this study we confirmed that ABI4 is also required for its expression  
168 during seed development, as no GUS activity of the *pABI4:GUS* transgene was  
169 detected in the *abi4* mutant background (Figure 1A). This data further confirms the  
170 critical auto-activation function of ABI4.

171

### 172 **The LAFL transcription factors regulate *ABI4* expression**

173         Given the similarities in the temporal expression between ABI4 and the  
174 LAFL regulators during seed development, we evaluated their impact on the  
175 expression of *ABI4*. Therefore, we introduced the 3Kb *pABI4:GUS* transgene  
176 (*pABI4:GUS*) into the *lec1*, *lec2*, *fus3* and *abi3* mutant backgrounds and analyzed  
177 the GUS temporal and spatial expression throughout seed development. As shown  
178 in Figure 1B we did not detect any major differences of *ABI4* expression in the *lec1*  
179 or *fus3* mutants compared to wild-type seeds, except for an ectopic expression of  
180 *ABI4* in the suspensor tissue in the *lec1* mutant that is maintained even in the dry  
181 seeds (Figure 1B *lec1* panels 2-7). In the homozygous *abi3* mutant seeds we  
182 observed two contrasting expression patterns where 17% of the seeds display a  
183 pattern similar to wild-type, but in 83% of the seeds no GUS activity was detected

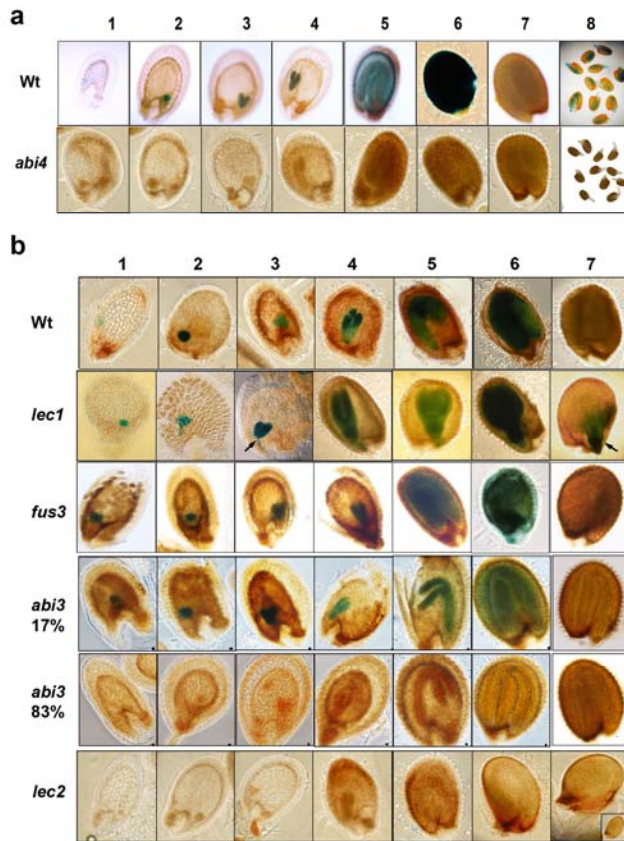

**Figure 1.- ABI4 and the LAFL transcription factors regulate the expression of ABI4 during seed development.** A) Expression pattern of the 3kb *ABI4*:GUS transgene monitored in wild-type (Wt) and *abi4* mutant embryos at preglobular (1), globular (2), heart (3), torpedo (4), bent cotyledon (5), mature (6) dry seeds (7) and 24h germinating seedlings (8). A representative pattern for each line is shown. B) Pattern of GUS expression in Wt, *lec1*, *fus3*, *abi3* and *lec2* mutant embryos at preglobular (1), globular (2), heart (3), torpedo (4), bent cotyledon (5), mature (6) developing seeds and dry seeds (7). The different expression patterns observed in the *abi3* mutant are shown and the percentage (%) of each is included. Arrow points to the suspensor tissue in the *lec1* mutant.

184 in any stage of the developing seed (Figure 1B *abi3* panels). Remarkably, in the  
185 case of the *lec2* mutant, GUS activity was undetectable in all stages of the  
186 developing seeds compared to wild-type (Figure 1B *lec2* panels). We corroborated  
187 that the absence of GUS activity in the *abi3* and *lec2* mutant backgrounds was not  
188 caused by mutations or silencing of the *pABI4*:GUS transgene as this reporter  
189 accumulates at normal levels in the corresponding heterozygous mutant seeds  
190 (Figure S1). Altogether these results provide novel insights into the regulation of  
191 the *ABI4* gene during seed development, where the transcription factors ABI3 and,  
192 in particularly LEC2, play central roles as positive regulators, while LEC1 has a  
193 negative role restricted to the suspensor tissue.

194



195 **LEC2 but not ABI3 is essential for *ABI4* expression during early seedling**  
196 **development**

197 Previous studies showed that the *ABI4* transcript accumulates during  
198 germination and early seedling development (Soderman et al., 2000; Arroyo et al.,  
199 2003; Bossi et al., 2009). Given that our previous analyses showed important  
200 alterations in the expression of *ABI4* in the *lec2* and *abi3* mutants during seed  
201 development, we were interested to determine whether these transcription factors  
202 affect the temporal and/or spatial expression of *ABI4* in germinating seedlings.  
203 Therefore, we analyzed the GUS activity of the *pABI4*:GUS transgene in  
204 germinating seedlings of *lec1*, *lec2* and *abi3*. Since mutants of the LAFL  
205 transcription factors are desiccation intolerant, we collected the homozygous *lec1*,  
206 *lec2* and *abi3* and wild-type seeds prior to desiccation and transferred them to  
207 media for germination. Expression of the GUS reporter was detected in the *lec1*  
208 mutant in more than 98% of the germinating seeds (Figure 2E) as in the 3 day-old  
209 seedlings (Figure 2F), displaying a similar pattern to the wild-type (Figure 2A and  
210 2B). In the case of the *abi3* mutant we also detected GUS expression in 100% of  
211 the germinating seedlings (Figure 2C) that is maintained in the 3 day-old plants  
212 (Figure 2D), albeit at a lower level than in the wild-type seedlings (Figures 2A and  
213 2B). These results support a role for ABI3 in the maintenance of the expression  
214 level of *ABI4* during early seedling development. Interestingly, in the *lec2* mutant  
215 the GUS activity was undetectable in the germinating seedlings (Figure 2G), as  
216 well as in 3-day-old plants (Figure 2H). This result demonstrates that the  
217 expression of the *ABI4* gene is fully dependent on the presence of the LEC2  
218 regulator during germination and early seedling development.  
219 To further explore the participation of LEC2 in the expression of *ABI4* during the  
220 early vegetative development, the transcript levels of *ABI4* were analyzed by  
221 quantitative real time PCR (RT-qPCR) in 24 h wild-type, *lec1 abi3* and *lec2*  
222 germinating seedlings, a time where the expression level of this gene is high in  
223 wild-type plants (Arroyo et al., 2003; Bossi et al., 2009). Our analysis showed a  
224 significant reduction in the accumulation of the endogenous *ABI4* transcript to  
225 approximately 60% in the *lec1* and *abi3* mutants, further supporting the role of

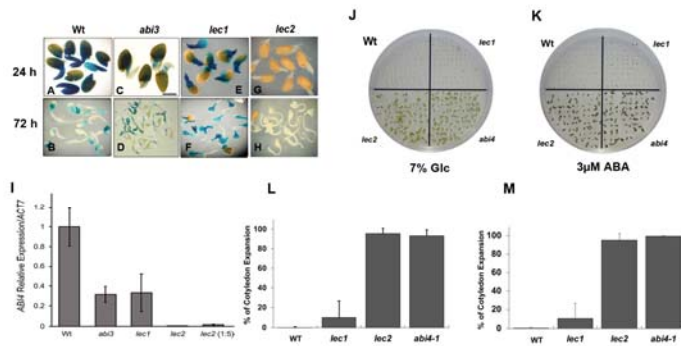

**Figure 2. LEC2 is essential for the correct activation of ABI4 during early seedling development and for glucose and ABA signaling responses.** Representative expression of 3KABI4::GUS germinating seedlings at 24 h (A, C, E and G) and 72h (B, D, F and H) after transferred to germinating conditions for wild-type (Wt), *abi3*, *lec1* and *lec2* mutants. (I) Analysis by RT-qPCR of *ABI4* transcript levels from Wt, *abi3*, *lec1* and *lec2* mutant seedlings 24h after transference to germinating conditions. Transcript level using five times more *lec2* cDNA (1:5) is shown. Expression is reported relative to that of *Actin 7 (ACT7)*. Bars are means  $\pm$ SE of triplicate biological experiments (each with n=2 technical replicates) and with P values  $p < 0.05$  between wild-type compared to the mutants (Student's t test). Phenotypes of 14-day-old seedlings of Col-0 wild-type (Wt), *lec1*, *lec2* and *abi4* seedlings grown in the presence of media with 7% glucose (Glc) (J) or 3 µM ABA (L). (K) Percentage (%) of seedlings with expanded green cotyledons in the presence of 7% Glc (K) or 3 µM ABA (M). Error bars represent the SD of biological independent triplicate experiments.

226 these two transcription factors in the expression of this gene (Figure 2I). Moreover,  
 227 similar to the GUS activity analysis, the *ABI4* endogenous transcript level in the  
 228 *lec2* mutant was almost undetectable, showing at least 100-fold times lower  
 229 expression than wild-type seedlings (Figure 2I), supporting the essential role of  
 230 LEC2 for the expression of *ABI4*. Collectively our data demonstrate previously  
 231 undescribed roles of the LEC1, ABI3 and, in particularly LEC2, in maintaining the  
 232 expression levels of the *ABI4* gene during vegetative development.

233

### 234 **The *lec2* mutant is insensitive to ABA and sugar**

235 It is known that *ABI4* is required for proper ABA and sugar perception during early  
 236 seedling development and its absence results in an ABA- (*abi*) and glucose- (Glc)  
 237 (*gin*) insensitive phenotypes (Arenas-Huertero et al., 2000; Huijser et al., 2000;  
 238 Finkelstein et al., 2011). To investigate whether the *ABI4* expression defects  
 239 observed in the *lec1*, *abi3* and *lec2* seedlings affect the Glc and/or ABA sensitivity,  
 240 we grew these mutants in the presence of 7% Glc or 3 µM ABA. These two  
 241 conditions arrest greening and growth in wild-type seedlings, but not in *abi4* that  
 242 behaves like the *abi* and *gin* mutants (Arenas-Huertero et al., 2000). We observed  
 243 that in the presence of 7% Glc (Figure 2J and 2K) or 3 µM ABA (Figure 2L and 2M,  
 244 more than 90% of the *lec1* seedlings became arrested similar to wild-type

245 seedlings, demonstrating that the lower transcript levels of *ABI4* observed in this  
246 mutant do not result in *gin* or *abi* phenotypes, that is consistent with previous  
247 findings (Parcy et al., 1997). As previously reported (Dekkers et al., 2008), more  
248 than 90% of the *abi3* mutant seedlings displayed green cotyledons and continue  
249 growing in the presence of Glc or ABA (Figure S2), a phenotype similar to the *gin*  
250 and *abi* mutants. Also, this analysis showed that more than 90% of the *lec2*  
251 seedlings display clear *gin* and *abi* phenotypes, comparable to the *abi3* and the  
252 *abi4* seedlings, in the presence of 7% Glc (Figure 2J and 2K) or 3 $\mu$ M ABA (Figure  
253 2L and 2M). These results confirm that the low levels of the *ABI4* transcript present  
254 in the *lec2* mutant seedlings results leads to alterations in the Glc and ABA  
255 sensitivity, further supporting a critical role of LEC2 in the regulation of *ABI4*.

256

### 257 **Proper *ABI4* expression depends on positive and negative *cis*-acting** 258 **elements**

259 The regulation of the *ABI4* expression by the LEC2 and ABI3 transcription factors  
260 could result from direct or indirect mechanisms. To further explore these  
261 possibilities, we analyzed the upstream regulatory region of the *ABI4* gene looking  
262 for putative ABI3 and LEC2 binding sites. These two transcription factors bind to  
263 RY DNA motifs or variants, containing the “CATG” core sequence (Braybrook et  
264 al., 2006; Swaminathan et al., 2008; Baud et al., 2016). Also, the presence of  
265 additional elements such as E- or G-boxes nearby can influence transcription  
266 factor binding (Abraham et al., 2016). The analysis of the 3 kb *ABI4* upstream  
267 sequence showed two sequences that fit the RY consensus elements. One of  
268 them, here referred to as RY1 (CATGCA), localizes -2467 bp upstream from the  
269 *ABI4* ATG and the other (RY2, GCATG) is at -2973 bp (Figure 3A). In addition, a  
270 canonical G-box (CACGTG) is present between the two RY motifs (Figure 3A). To  
271 analyze the possible participation of these RY elements in the transcriptional  
272 regulation of *ABI4*, we generated constructs containing consecutive deletions of  
273 the *ABI4* upstream sequence fused to the *GUS* reporter gene. The first deletion  
274 includes 2570 bp upstream from the *ABI4* ATG (2.5K*ABI4*) and lacks the RY2 and  
275 G-box elements (Figure 3A). The second deletion removed both RY elements as

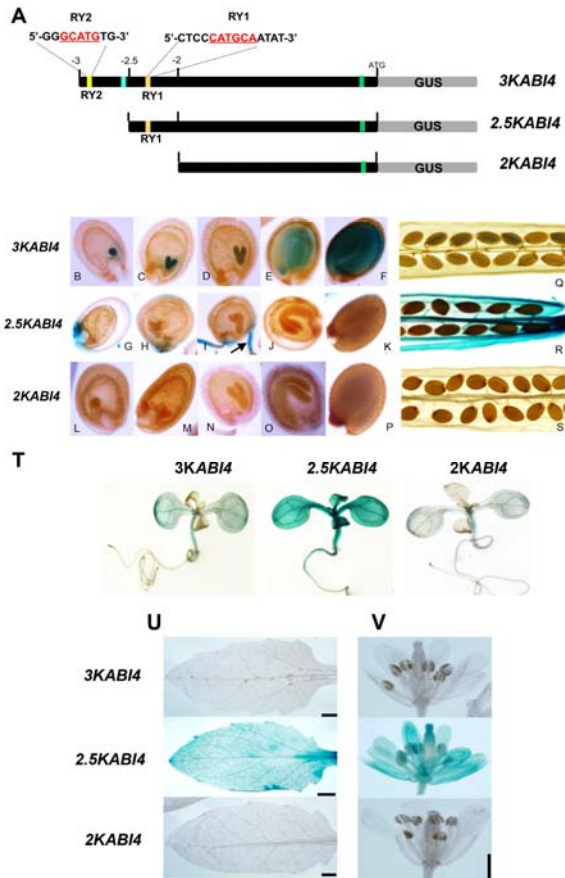

**Figure 3. Analysis of the upstream regulatory region required for the *ABI4* gene expression.** (A) Diagram of the upstream regulatory region of the *ABI4* gene showing the deletion fragments generated, marked in kb from the ATG. The location within the 3 kb upstream region of the two RY motifs and their corresponding sequences (yellow boxes), the putative G-box (blue box) and the CE element are indicated. Histochemical expression pattern of the GUS reporter in embryos at globular (B, G, L), heart (C, H, M), torpedo (D, I, N), bent cotyledon (E, J, O) and mature (F, K, P) stages and from siliques (Q, R, S), 14 day-old seedlings (T), rosette leaves (U) and flowers (V) tissues from representative transgenic lines expressing GUS from 3kb (*3KABI4*), 2.5 kb (*2.5KABI4*) and 2 kb (*2KABI4*) upstream sequences from the ATG of *ABI4*. The arrow points to maternal tissues. Scale bars: 500  $\mu$ m.

276 well as the G-box (*2KABI4*) leaving 1990 bp of the upstream *ABI4* sequence  
 277 (Figure 3A). Both deletions retained the *ABI4* binding site (CE element), that  
 278 localizes near the transcription initiation site. We generated transgenic plants  
 279 carrying each deletion and the expression of GUS was analyzed in independent  
 280 lines and compared to lines carrying a 3K fragment (*3KABI4*:GUS) (Soderman et  
 281 al., 2000; Bossi et al., 2009). In contrast to the *3KABI4*:GUS lines (Figure 3B-F),  
 282 the GUS activity in the *2.5KABI4* and *2KABI4* deletion lines was undetectable in all  
 283 stages of the developing seed (Figure 3G-P). These results are consistent with the  
 284 RY and/or the G-box being essential *cis*-acting elements for the trans-activation of

285 *ABI4* during embryo development. Intriguingly, this analysis also showed that the  
286 2.5K*ABI4* deletion lines, ectopic GUS expression in the funicle and the valves of  
287 the siliques (Figure 3I and 3R) not present in the 3K*ABI4* (Figure 3B-F and 3Q) or  
288 the 2K*ABI4* (Figure 3L-P and 3S) lines. Furthermore, this ectopic expression  
289 extended to other vegetative tissues in the 2.5Kp*ABI4* lines (Figures 3 and S3)  
290 including the primary (Figure 3T) and rosette leaves (Figure 3U), the primary root  
291 (Figure 3T) and the flowers (Fig. 3V). All these are tissues where *ABI4* expression  
292 was never previously observed with the 3K*ABI4* transgene (Soderman et al.,  
293 2000; Bossi et al., 2009). This ectopic *ABI4* expression was exclusive of the  
294 2.5K*ABI4* deletion and was not observed in the 2K*ABI4* transgenic lines (Figures  
295 3S-W and S3). These results demonstrated that within the 500 bp between -3 kb  
296 and -2.5 kb of the *ABI4* upstream sequence there are essential *cis*-acting elements  
297 required to activate the expression of *ABI4* in the developing seeds and young  
298 seedlings and also for the repression of this gene in vegetative tissues.

299

### 300 **The RY motifs are essential for proper *ABI4* expression**

301 To further dissect the function of the RY motifs in the activation and/or  
302 repression of the *ABI4* gene, we generated site-specific mutants in each element.  
303 We replaced six bases that included the core CATG sequence in the RY motifs  
304 with an AAATTT sequence using the 3K*ABI4*:GUS construct as template (Figure  
305 4A) and generated transgenic lines for the single and double mutants. Interestingly,  
306 the lines containing mutations in the RY1 (mRY1) or in the RY2 (mRY2) resulted in  
307 undetectable GUS activity in the embryo seeds (Figure 4C and D and S4),  
308 compared to the 3K*ABI4* lines (Figure 4B). On the other hand, in these mutant  
309 lines we observed ectopic GUS expression in vegetative organs including leaves  
310 and flowers (Figure 4C and 4D). This GUS expression pattern correlates with the  
311 one observed in the 2.5K*ABI4* deletion lines (Figure 3). Finally, the GUS  
312 expression pattern of the lines containing both mutations (mRY1 RY2) was  
313 indistinguishable from the single mutants in the embryo and vegetative tissues  
314 (Figure 4E). Altogether, these results further demonstrate RY1 or RY2 motifs as  
315 essential *cis*-acting sites not only for the *ABI4* induction in the developing seed, but

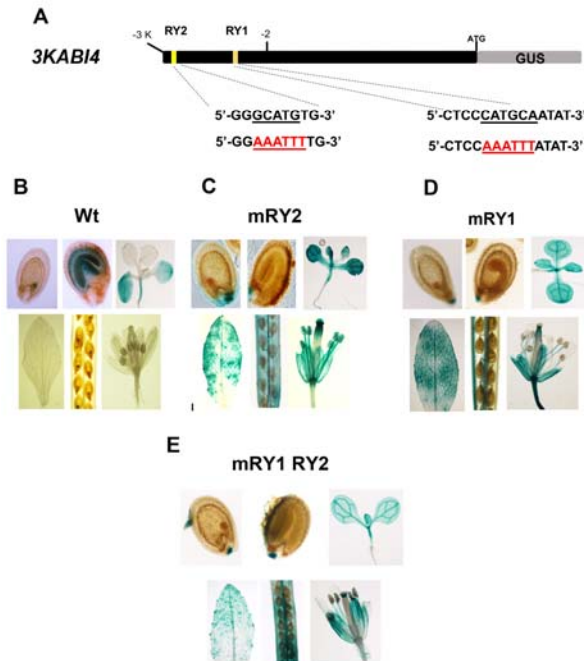

**Figure 4. The RY motifs present in the regulatory region of *ABI4* are essential for the correct expression of the *ABI4* gene.** (A) Diagram of the upstream region of *ABI4* showing the mutations generated in the RY elements. The changes introduced in each mutant construct are indicated in red compared to the original sequence. Histochemical expression of seeds at globular and bent cotyledon stages or in 14 day-old seedlings, rosette leaves, siliques and flowers from transgenic representative lines expressing GUS from the 3kb *ABI4* upstream sequence containing the (B) original RY motifs (Wt) or the site-specific RY mutations in the (C) RY2 (mRY2), (D) RY1 (mRY1) and (E) the double RY1 RY2 (mRY1 RY2) motifs.

316 also for its repression in vegetative tissues and indicates that both RY elements  
317 are required for the correct expression of the *ABI4* gene.

318

319 **The expression of *ABI4* is repressed in vegetative tissues by the HSI2/VAL1**  
320 **and HSL1/VAL2 repressors**

321 The RY motifs are known to be the binding site for the B3-domain regulators  
322 including HSI2/VAL1 and HSL1/VAL2 (HSI/VAL) factors, two proteins that mediate  
323 transcriptional repression of different genes through their interaction with  
324 chromatin-modifying proteins (Suzuki et al., 2007; Veerappan et al., 2014; Tao et  
325 al., 2019). Considering the ectopic expression observed for the *ABI4* gene in  
326 vegetative tissues when the RY elements were deleted or mutated, we reasoned  
327 that the HSI/VAL proteins were probably responsible for the repression of *ABI4*  
328 expression in vegetative tissues. To verify this hypothesis, we determined the  
329 expression level of *ABI4* by RT-qPCR in 10 day-old *hsi2 hsl1* loss-of-function

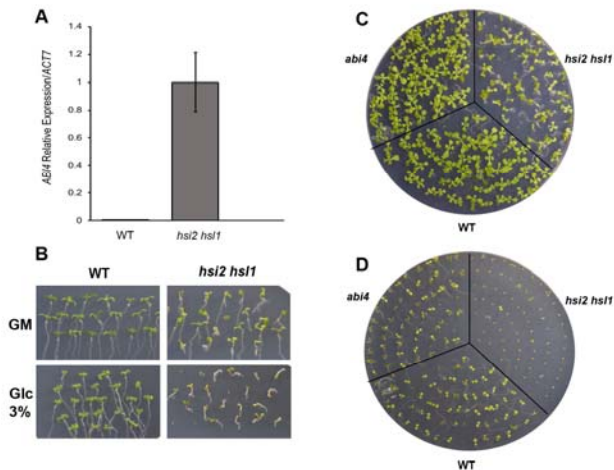

**Figure 5. HSI2/VAL1 HSL1/VAL2 transcription factors are required for the correct repression of *ABI4*.** (A) Analysis by RT-qPCR of the *ABI4* transcript accumulation in wild-type (Wt) or the *hsi2 hsl1* loss-of-function double mutant 10 day-old seedlings. *ABI4* expression is reported relative to that of *Actin7* (*ACT7*). Bars are means  $\pm$ SE of triplicate biological experiments (each with n=2 technical replicates). (B) Phenotypes of 10 day-old Col 0 wild-type (Wt) and *hsi2 hsl1* mutant seedlings grown in the presence of 3% glucose (Glc). (C) Phenotypes from 15 day-old Col-0 wild-type (Wt), *hsi2 hsl1* and *abi4* mutants seedlings grown on GM media or (D) GM media in the presence of 0.5  $\mu$ M ABA.

330 mutant seedlings, because at this stage the *ABI4* transcript level is almost  
331 undetectable in wild-type plants (Tsukagoshi et al., 2007; Bossi et al., 2009). In  
332 agreement with our hypothesis, we observed a 100-fold accumulation of the *ABI4*  
333 transcript in the *hsi2 hsl1* mutant compared to wild-type seedling (Figure 5A). This  
334 result is consistent with the ability of HSI/VAL proteins to repress *ABI4* expression  
335 in vegetative tissues. This high *ABI4* transcript level in the *hsi2 hsl1* mutant also  
336 correlates with Glc- (Figure 5B) and ABA-hypersensitive (Figure 5D) phenotypes in  
337 these mutant seedlings, as previously reported for sucrose (Tsukagoshi et al.,  
338 2007). This result further supports the idea that high *ABI4* transcript level in the  
339 *hsi2 hsl1* mutant translates into higher *ABI4* activity.

340

### 341 **LEC2 and HSI2/VAL1 bind to the same RY elements resulting in changes in** 342 **chromatin accessibility**

343 Altogether our new data demonstrates that LEC2 is an essential activator of  
344 *ABI4* expression, whereas *ABI3* has an important, but not essential, contribution in  
345 its transcription. In addition, we provide unequivocal evidence that the HSI/VAL  
346 repressors are required for silencing *ABI4* gene expression in the vegetative

347 tissues. Furthermore, our molecular analyses showed that the two RY motifs (RY1  
348 and RY2) present in the *ABI4* upstream sequence are not only required for its  
349 activation by LEC2 and ABI3, but for HSI/VAL-dependent repression.

350         Since the LEC2, ABI3 and HSI/VAL proteins recognize the same *cis*-acting  
351 sequences, we reasoned that it was possible that these factors interact directly  
352 with these motifs. To investigate this possibility we mined available public genome  
353 wide chromatin immunoprecipitation coupled with high throughput sequencing  
354 (ChIPseq) data recently published for the LEC2 and HSI/VAL proteins (Wang et al.,  
355 2020; Yuan et al., 2021). The ChIPseq analysis for LEC2 was carried out in  
356 explants where LEC2 was induced by dexamethasone from the 35S::LEC2-GR-3X  
357 FLAG construct (Wang et al., 2020). Using this data, we corroborated a clear  
358 binding peak between -2K to -3K of the *ABI4* upstream sequence enriched in the  
359 LEC2-induced sample (DEX) compared to the control (Figure 6A). This region  
360 includes the two RY motifs that we showed are required for the *ABI4 trans*-  
361 activation in the developing seed (Figure 6). Thus, our data is fully consistent with  
362 the direct *trans*-activation of *ABI4* by LEC2. Moreover, a recent publication using  
363 ChIP-chip analysis of a p*ABI3*:ABI3-HA tagged transgene reported *ABI4* as an  
364 ABI3-associated gene, also supporting a direct interaction of ABI3 to the *ABI4*  
365 locus (Tian et al., 2020). Unfortunately, we were not able to identify the ABI3  
366 binding region in the *ABI4* locus, but we hypothesize that the two RY elements  
367 identified here are most likely the binding sites also for ABI3 since no other  
368 sequences that fit the known binding element are found close to the *ABI4* gene.

369         Finally, the potential interaction of the HSI2/VAL1 and/or HSL1/VAL2  
370 proteins was analyzed using the ChIPseq data available from young seedlings  
371 expressing the VAL1-GFP or VAL2-GFP fusion proteins (Yuan et al., 2021). Using  
372 the published data, we observed an enrichment of a HSI2/VAL1 binding peak in  
373 the upstream region of *ABI4* (Figure 6B). However, due to a high basal background  
374 present in this study the interaction of the HSL1/VAL2 was not clear (data not  
375 shown). To further confirm this interaction chromatin immunoprecipitation (ChIP)  
376 analysis was performed using a Val1-HA transgenic line (Questa et al., 2016).  
377 From this analysis we confirmed an *in vivo* binding of VAL1 to the *ABI4* sequences



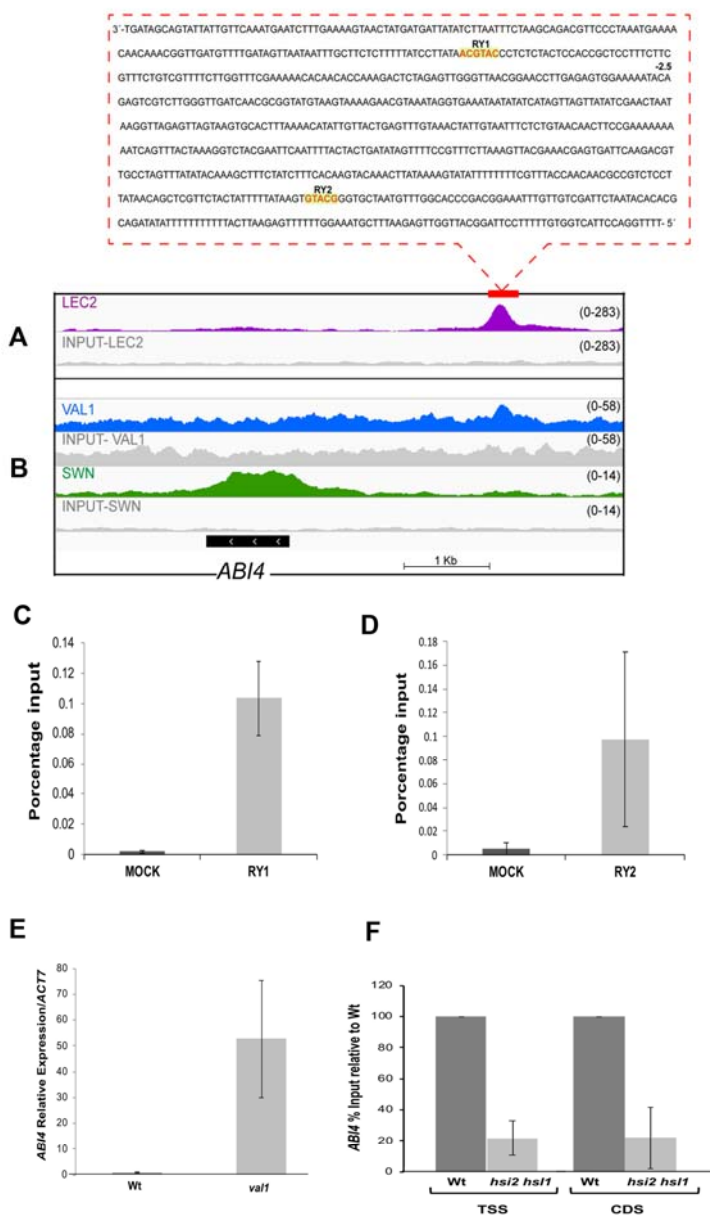

**Figure 6. LEC2 and HIS/VAL factors bind to the *ABI4* upstream regulatory sequence.** ChIP-seq signal for the *ABI4* loci for the (A) LEC2-GR-3xFLAG (Wang et al., 2020) and for the (B) VAL1-GFP and SWN-GFP (Yuan et al. 2021) DNA binding factors. The binding peaks in each case were detected and compared to the corresponding negative control. The location of the *ABI4* coding region is indicated by the black box. In the upper box the sequence included in the peaks that is common to the LEC2 and VAL1 regulators is shown and the location of the two RY elements is highlighted in yellow. Chromatin immunoprecipitation (ChIP) of the VAL1-HA protein binding in 10-day-old Col-0 (Wt) (dark grey) and VAL1-HA (light grey) seedlings along the *ABI4*. The qPCR from the immunoprecipitated sample was done using the pABI4-RY1-Fw/ and RY1 Chip qPCR Rv (C) or the pABI4-RY1RY2-Fw/ RY2 Chip qPCR Rv (D) primer pairs covering around the RY1 and RY2 elements. (E) Analysis by RT-qPCR of the *ABI4* transcript accumulation in wild-type (Wt) or the *val1* 10 day-old mutant seedlings. *ABI4* expression is reported relative to that of *Actin7* gene (*ACT7*). (F) ChIP analysis of the H3K27me3 in 10-day-old Col-0 (Wt) (dark grey) and *hsi2 hsl1* mutant (light grey) seedlings. The qPCR from the immunoprecipitated sample was done using the ABI4-ChIP-F and ABI4-ChIP-R primer pair covering the transcription initiation site of *ABI4* (TSS) and the primers ABI4-558Fw and ABI4-734Rv in the body of the *ABI4* gene. The bars are the mean  $\pm$  SE of triplicate independent experiments (each with technical duplicates n = 2).

378 containing the RY1 (Figure 6C) and RY2 (Figure 6D) motifs. Interestingly, the  
 379 interacting peaks observed for the LEC2 and HSI2/VAL1 proteins in these  
 380 independent studies overlap the region that includes the two RY *cis*-acting motifs,

381 further supporting the role of these sequences as the binding site of these two  
382 proteins. To further address the role of the HSI1/VAL2 in the *ABI4* regulation we  
383 analyzed by qRT-PCR the expression of *ABI4* gene in the single *val1* mutant  
384 background. We observed that the absence of VAL1 alone resulted in a more than  
385 50 times higher *ABI4* expression in comparison to the wild-type Col-0 background  
386 demonstrating that VAL2 cannot compensate the absence of VAL1. However, the  
387 upregulation observed in the *val1* mutant is lower than the one in *val1 val2* double  
388 mutant (more than 100X) in comparison to the wild type (Figure 5A). This result  
389 supports that VAL2 also participates in *ABI4* repression, at least in the absence of  
390 VAL1.

391 Histone modifications play an important function in the gene silencing  
392 mediated by HSI/VAL regulators as a result of the recruitment of the Polycomb-  
393 Repressive Complex 2 (PRC2) that catalyzes the tri-methylation of K27 for histone  
394 (3H3K27m3) deposition and transcription repression (Yuan et al., 2021). To  
395 determine if the chromatin status of the *ABI4* gene correlates with the presence or  
396 absence of the HSI/VAL regulators, we analyzed the levels of H3K27m3 mark by  
397 ChIP followed by qPCR around *ABI4* transcription initiation site in 14 day-old wild-  
398 type and *hsi2 hsi1* mutant seedlings. Our experimental data shows that in the *hsi2*  
399 *hsi1* mutant the deposition of the H3K27me3 mark around the *ABI4* transcription  
400 initiation site and in the body of the gene was significantly reduced, with only 17%  
401 of the amount found in wild-type seedlings (Figure 6C). This result demonstrates  
402 that the absence of the HSI/VAL repressors significantly dilutes the H3K27m3  
403 mark, and that is consistent with an active chromatin state and a high *ABI4*  
404 expression levels observed in this mutant (Figure 5A). Moreover, our data is also  
405 consistent with a high deposition of the SWN subunit, the Arabidopsis H3K27  
406 methyl-transferases of PRC2 complex, that was in ChIP-seq studies (Yuan et al.,  
407 2021) across the entire of the *ABI4* gene in vegetative tissues (Figure 6B).  
408 Collectively these results support a direct regulation by LEC2, ABI3 and  
409 HSI2/VAL1 in the up-regulation of seed *ABI4* repression during vegetative  
410 development that is critical for the correct regulation of this transcription factor  
411 during plant development.

412

413

## 414 **DISCUSSION**

415 Evidence has accumulated demonstrating that the transcription factor *ABI4*  
416 is an integrator for diverse functions during plant development (Chandrasekaran et  
417 al., 2020). Consistent with the multifaceted role of *ABI4*, its accumulation and  
418 activity are strictly regulated at the transcriptional and post-translational levels  
419 (Chandrasekaran et al., 2020; Eisner et al., 2021; Zhou et al., 2021). *ABI4* displays  
420 a restricted spatio-temporal expression pattern during plant development that is  
421 also modulated by environmental stimuli, such as nutrients, hormones and abiotic  
422 stresses (Chandrasekaran et al., 2020). The correct transcriptional regulation of  
423 *ABI4* is critical for proper plant growth and stress responses, such as ABA and  
424 sugar perception (Finkelstein, 1994; Arenas-Huertero et al., 2000; Arroyo et al.,  
425 2003), and to avoid physiological harm due to its overexpression (Shkolnik-Inbar  
426 and Bar-Zvi, 2010; Shu et al., 2016b). Accordingly, several transcription factors act  
427 as negatively regulate *ABI4* gene expression, including various WRKYs, RAV1 and  
428 SCR proteins (Shang et al., 2010; Cui et al., 2012; Feng et al., 2014). In contrast,  
429 *ABI4* itself stands as a central activator of its own expression during early seedling  
430 development (Bossi et al., 2009) and in this study we show that this auto-regulatory  
431 mechanism extends to all stages of the developing seed.

432 Consistent with previous reports, we confirm that *ABI4* is expressed since  
433 very early stages in embryogenesis (Soderman et al., 2000; Penfield et al., 2006)  
434 and its transcript is maintained at high levels during all the seed development,  
435 except for the dry seed. Some regulators of *ABI4* expression during the developing  
436 seed have been reported (Huang et al., 2016b), but the mechanisms involved in  
437 ensuring the correct spatio-temporal expression have not been identified. In this  
438 study, we demonstrate that the LAFLs regulators play distinctive roles in the  
439 spatial-temporal regulation of *ABI4* not only during embryogenesis but also during  
440 vegetative development, except for *FUS3* which does not appear to have a major  
441 contribution. In contrast, our work provides clear evidence that the rest of the LAFL  
442 transcription factors have differential contributions on the *ABI4* gene expression.

443 An important contribution of this work is the demonstration that *LEC2* and  
444 *ABI3* are key regulators for the *ABI4* gene expression. Specifically, our evidence

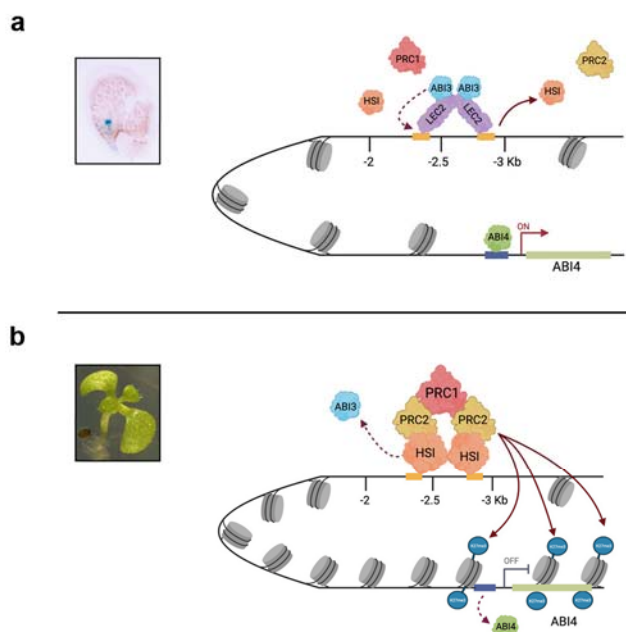

**Figure 7. Model of the regulation of the *ABI4* gene expression by the LEC2, ABI3, HSI/VAL and ABI4 transcription factors.** (A) The initial *ABI4* transcription activation occurs early in the of the developing seed (proembryo stage) by the initial activation by LEC2 dimer interacting with the two RY elements. This activation is critical for *ABI4* transcription initiation, probably establishing a permissive chromatin conformation schematized by a lower nucleosome number (grey cylinders) and no H3K27me3 mark. ABI3 binds to the same motifs, stabilizing LEC2 DNA as LEC2:ABI3 heterodimers or later by itself later once an open chromatin is established and the level of LEC2 decreases. The *de novo* translated ABI4 activates its expression during all developing seed stages. At these developmental stages the HSI/VAL repressors or the PRC2 complex do not interact with the *ABI4* locus due to the presence of LEC2 or ABI3. (B) During vegetative growth the absence of LEC2 and/or low ABI3 level together with the accumulation of HSI/VAL repressors allows these proteins to interact with the RY elements in the *ABI4* locus. This interaction results in the accumulation of the PRC2 complex and probably the increase in the nucleosome number (grey cylinders) and the H3K27me3 mark; the transcriptional activity of the *ABI4* decreases and consequently the gene is silenced.

445 shows that LEC2 is an essential activator of *ABI4* transcription, not only in the  
 446 developing seed but is also required during early seedling development (Figure 7).  
 447 Interestingly, although LEC2 is expressed mainly during early seedling  
 448 development (Santos-Mendoza et al., 2008; Baud et al., 2016; Boulard et al., 2017;  
 449 Lepiniec et al., 2018) the absence of LEC2 results in undetectable *ABI4* expression  
 450 in the germinating seedlings and in ABA- and Glc-insensitive phenotypes,  
 451 demonstrating that LEC2 is one of the critical regulators of the *ABI4* expression.  
 452 Likewise, we observed that ABI3 plays an important role regulating *ABI4*  
 453 expression, but in contrast to LEC2, this factor is not absolutely required as a  
 454 significant proportion of embryos accumulate normal levels of the *ABI4* transcript  
 455 even in its absence. Moreover, in contrast to LEC2, ABI3 regulatory function is  
 456 mostly restricted to developing seeds, further supporting the unique role of LEC2 in  
 457 the regulation of *ABI4* expression.

458            Additionally we observed a complex role for LEC1 in the regulation of *ABI4*.  
459 LEC1 acts as a negative regulator of *ABI4* during embryogenesis in the embryo  
460 suspensor tissue, but as an activator in young seedlings. Although the  
461 mechanism(s) involved in these antagonistic activities will require future analysis,  
462 we reasoned that they could result from indirect effects caused by the absence of  
463 LEC1. Because LEC1 is required for the suspensor specification (Lotan et al.,  
464 1998), and the ectopic *ABI4* expression observed in its absence might derive from  
465 the identity defects in this tissue. Also based on the previous observation that  
466 LEC1 activates the expression of *LEC2* and *ABI3* (To et al., 2006), the decrease of  
467 *ABI4* transcript levels observed during germination could be the consequence of a  
468 lower accumulation of these two transcription factors. Although has been shown  
469 that LEC1 and LEC2 or *ABI3* can form complexes to regulate gene expression  
470 (Boulard et al., 2018), the regulation of *ABI4* is clearly distinct.

471            Importantly, we also provide new evidence that the correct modulation of  
472 *ABI4* expression relies not only on its activation in the embryo but also on its  
473 repression in vegetative tissues (Figure 7). We demonstrate that the repression of  
474 the *ABI4* in vegetative tissues is mediated by the HSI/VAL repressors; these  
475 repressors perform critical functions in the transition from embryo to seedling  
476 development (Suzuki et al., 2007; Veerappan et al., 2012). This negative regulation  
477 is critical in preventing the accumulation of *ABI4* in the growing plant, and causes  
478 ABA- and Glc-hypersensitivity as well as the downregulation of GA biosynthetic  
479 genes that are harmful for plant growth (Tsukagoshi et al., 2007; Shu et al., 2013).

480            The fact that the activation and the repression of the *ABI4* gene depends on  
481 the two RY elements located more than 2 kb upstream of this gene, supports that  
482 the observed regulation results from the binding of the LEC2, *ABI3* and  
483 HSI2/VAL1 transcription factors to the same two *cis*-acting motifs (Figure 7) and do  
484 not support that these regulators interact with other *cis*-acting elements, as was  
485 proposed for *ABI3* (Tian et al., 2020). This is further corroborated by our ChIP  
486 analysis with VAL1, the published ChIP-seq data from the LEC2 and HSI2/VAL1  
487 transcription factors (Tian et al., 2020; Wang et al., 2020; Yuan et al., 2021) and  
488 from the ChIP-Chip data of *ABI3* (Tian et al., 2020). All of these studies identified

489 *ABI4* as a direct target. This regulatory circuit could mediate an effective  
490 mechanism for fine-tuning of the correct spatial and temporal accumulation of *ABI4*  
491 during plant development. Similar antagonism between the AFLs activation and  
492 HSI/VALs repression has been documented for other key genes involved in the  
493 ABA, GA and ethylene signaling (Braybrook et al., 2006; Stone et al., 2008), in the  
494 transition between embryogenesis and vegetative development, including the  
495 LAFLs (Wang and Perry, 2013; Jia et al., 2014) and in the regulation of flowering  
496 (*FLC*) (Tao et al., 2019).

497 Even though our study demonstrates that both LEC2 and ABI3 are important  
498 activators of *ABI4* gene expression, these two proteins clearly do not have the  
499 exact same function. As previously described, the expression of *ABI4* is fully  
500 dependent on LEC2, and this is not the case for ABI3. We hypothesize that the role  
501 of LEC2 resembles that of the pioneer activators (Zaret, 2018), that have the  
502 capacity to bind “*de novo*” to the *ABI4* locus early in embryogenesis promoting  
503 chromatin accessibility and activation of *ABI4* gene expression, and could  
504 potentially prevent the binding of HSI/VAL proteins (Figure 7). A similar pioneer  
505 transcription function has been documented for LEC1 (Tao et al., 2017).

506 Our results also suggest that the accessible chromatin status established by  
507 the initial activation by LEC2 can facilitate the recruitment of additional transcription  
508 regulators that may include ABI3 and the newly synthesized *ABI4* (Figure 7). This  
509 recruitment could initiate the essential *ABI4* feedback activation loop in the  
510 developing seeds and also during early seedling development (Bossi et al., 2009).  
511 Whether LEC2 alone or LEC2/ABI3 heterodimers could participate in this initial  
512 activation mechanism remains an open question for future analyses. The  
513 cooperation between LEC2 and ABI3 has been observed for the activation of the  
514 *OLE1* gene, where LEC2 and ABI3 bind to multiple RY motifs with a partial  
515 regulatory redundancy (Baud et al., 2016). This observation contrasts to our  
516 studies for *ABI4* where the two RY motifs are essential for positive and negative  
517 regulation. However, the fact that a proportion of the seeds have a normal *ABI4*  
518 expression pattern even in the absence of ABI3, supports the idea that LEC2 alone  
519 can fulfill the initial activation. It is possible that ABI3 participates in the *ABI4*

520 transcriptional activation by either stabilizing the binding of LEC2 or by amplifying  
521 *ABI4* expression after its initial activation (Figure 7). This role might resemble that  
522 of the MYC factor that works as a general amplifier of transcription in human cells  
523 (Nie et al., 2020). The accessible chromatin status defined by LEC2 is likely  
524 maintained later in vegetative development and perhaps also in particular cell  
525 types by additional regulators in response to hormone and nutritional (Glc) levels  
526 (Tang et al., 2017), similar to what was reported for the *FLC* gene (Tao et al.,  
527 2019).

528         Later in development and probably as a result of the substantial decrease or  
529 total absence of LEC2 protein and the accumulation of the HSI/VAL repressors,  
530 chromatin remodeling of the *ABI4* locus will led to silence its expression (Figure 7);  
531 similarly to what has been reported for other seed maturation genes (Tsukagoshi et  
532 al., 2007; Shkolnik-Inbar and Bar-Zvi, 2011). In particularly, previous studies have  
533 demonstrated that HSI2/VAL1 and HSL1/VAL2 transcriptional repressors induce  
534 transcriptional silencing by promoting the trimethylation of the lysine 27 of histone 3  
535 (H3K27m3) deposition as a result of their interaction with the Polycomb repressive  
536 complex 2 (PRC2) that is associated with gene silencing (Veerappan et al., 2014;  
537 Yuan et al., 2021). In support of this mechanism, we confirmed that *ABI4*  
538 repression correlates with high deposition levels of the H3K27m3 mark in the  
539 promotor region of *ABI4* and this depends on the presence of HSI2/VAL1 and  
540 HSL1/VAL2. This finding is similar to what has been described for other  
541 embryogenic genes including some of the LAFLs that promote the transition to  
542 vegetative development (Ogas et al., 1999). Based on the ChIP-seq data analyses  
543 for the HSI2/VAL1 and HSL1/VAL2 genes (Yuan et al., 2021), we observed that  
544 this repression correlates with an accumulation of the H3K27 methyl-transferase  
545 SWN of the PRC2 complex in the entire body of the *ABI4* gene (Figure 7).

546         In conclusion, this study describes a molecular mechanism that acts as a  
547 major spatio-temporal regulator of the *ABI4* transcription. This control mechanism  
548 results from the dynamic participation of multiple B3-type transcription factors that  
549 bind in the same *cis*-acting DNA elements to activate or repress *ABI4* gene  
550 expression. This precise control of the *ABI4* expression is mediated by changes in



551 the chromatin state of the gene locus during specific moments of the plant life  
552 cycle.

553

## 554 **MATERIALS and METHODS**

### 555 **Plant Material and Growth Conditions**

556 Experiments were conducted in *Arabidopsis thaliana* L. Columbia-0 (Col-0)  
557 ecotype. Seedlings were grown on 1X GM media [Murashige and Skoog (MS)  
558 media with Gamborg vitamins (Phytotechnology Laboratories, Shawnee Mission,  
559 KS), supplemented with 1% (w/v) sucrose, 0.5% MES and 0.8% (w/v) phytoagar]  
560 and stratified at 4° C for 4 days to break dormancy. Mature plants were grown in a  
561 5:3:2 mixture of Peat moss 3 (Sunshine, Sun Gro Horticulture, Agawam, USA):  
562 vermiculite (Sun Gro Horticulture): perlite (Agrolita, Tlalnepantla, Mexico)  
563 containing 1.7 kg/m<sup>3</sup> of Osmocote fertilizer (Everris, Geldermalsen, The  
564 Netherlands). Seedlings were grown in growth chambers (100 μmol m<sup>-2</sup> s<sup>-1</sup>) and  
565 plants in walk-in chambers (80 μmol m<sup>-2</sup> s<sup>-1</sup>) under 16:8h light:dark photoperiod at  
566 22°C. To evaluate Glc or ABA sensitivity plants were grown on 1X MS medium  
567 containing 3% Glc or agar with 0.5 or 3 μM ABA and 0.5% MES.

568 The 3KABI4::GUS x *abi4* line was previously reported (Bossi et al., 2009).  
569 The 3KABI4::GUS transgene was introduced into the *lec1*, *lec2*, *fus3* and *abi3*  
570 mutant backgrounds by crossing the *pABI4::GUS* homozygous transgenic line  
571 (Soderman et al., 2000) with heterozygous plants of each mutant. The F2 progeny  
572 lines were selected for homozygosity of the transgene on 50 μg/mL kanamycin GM  
573 media and later the homozygous *lec1*, *lec2*, *fus3* and *abi3* mutant seeds were  
574 selected following the corresponding phenotypes. The homozygous *lec1*, *lec2*, *fus3*  
575 mutants lines carrying the *pABI4::GUS* transgene were maintained by germinating  
576 immature seeds on kanamycin media. The *val1* was obtained from the Arabidopsis  
577 Stock Center (SALK 088606C). The VAL1-HA transgenic line (Questa et al., 2016)  
578 and the *hsi2 hsl1* double mutant (Chen et al., 2020) were kindly provided by Drs.  
579 Caroline Dean (John Innes Center) and Allan Randy (Oklahoma State University).

580

### 581 **ABI4 promoter analysis.**

582 For the deletion analysis three constructs were generated, containing 3 Kb,  
583 2.5 Kb and 2 Kb upstream of the start codon of *ABI4* using the pABI4 3Kb-FW,  
584 pABI4 2Kb-FW and pABI4 2.5Kb+attB1c FW 5' oligonucleotides and the pABI4 -89  
585 RV or RpABI4-89+B2c as 3' oligonucleotides (Supplemental Table 1). The  
586 fragments were introduced into the Gateway pMDC163 expression vector  
587 (Invitrogen, USA) to generate the corresponding transgenic lines (3K*ABI4*,  
588 2.5K*ABI4* and 2K*ABI4*) through *Agrobacterium tumefaciens*-mediated  
589 transformation into the Col-0 ecotype (Clough and Bent, 1998). At least three  
590 independent homozygous lines were selected for each construct.

591

### 592 **Site directed mutagenesis of the RY elements**

593 Mutants of the RY elements were generated by two step mutagenic PCR  
594 (Atanassov et al., 2009) using as template the 3 Kb fragment of the *ABI4* upstream  
595 region and the oligonucleotides pABI4SphI-attB1 and ABI4-mRY1-Rv for the  
596 upstream region and the ABI4-mRY1-Fw and RpABI4-89+B2c for the downstream  
597 region (Table S1). For the RY2 mutation (mRY2) we used the oligonucleotides  
598 pABI4SphI-attB1 and ABI4-mRY2-Rv, and ABI4-mRY2-Fw and RpABI4-89+B2c  
599 (Table S1). The double RY1 and RY2 mutant was generated using the mRY2  
600 fragment as templated and the mRY1 oligonucleotides. The reconstitution of the  
601 complete 3Kb *ABI4* fragments carrying the single or double RY mutations was  
602 obtained using the oligonucleotides pABI4SphI-attB1 and RpABI4-89+B2c (Table  
603 S1). The 3 Kb mutated fragments were introduced in the Gateway pMDC163  
604 expression vector (Invitrogen, USA). mRY1, mRY2 or -mRY1RY2 transgenic plants  
605 were generated in the Col-0 ecotype (Clough and Bent, 1998). At least three  
606 independent homozygous transgenic lines were selected for each construct.

607

### 608 **Histochemical GUS Staining**

609 Seedlings or plants were stained using the GUS histochemical assay (Jefferson,  
610 1987). The tissues were vacuum infiltrated and incubated in GUS histochemical  
611 buffer (5mM of ferrous and ferricyanide) overnight. Plants were clarified according  
612 to a published protocol by (Malamy and Benfey, 1997). The tissues were semi-

613 permanently mounted in a mix of 50 % glycerol and 2% DMSO and visualized  
614 using a stereoscopic (Nikon SMZ1500) or light (Nikon eclipse E600 ) microscopes.

615

## 616 **Expression Analysis**

617 Total RNA was extracted from Col-0 seedlings using TRIzol (Thermo Fisher  
618 Scientific, Waltham, MA, USA) as recommended by the manufacturer. For RT-  
619 qPCR, RNA was treated with DNase (Promega, WI,USA) and cleaned following  
620 the instructions provided by the manufacturer (RNA clean & concentrator kit, Zymo  
621 Research). Complementary DNA (cDNA) was synthesized from 3µg of RNA using  
622 a M-MLV Reverse Transcriptase kit (Invitrogen, Carlsbad, CA, USA) and oligo dT.  
623 The RT-qPCR experiments were performed using Maxima SYBR Green/ROX  
624 qPCR Master Mix (Thermo Scientific, Baltics, UAB, Lithuania) on a Light Cycler  
625 480 Roche. The oligonucleotides used in this analysis (ABI4-558Fw/ABI4-784Rv,  
626 for *ABI4* and ACT7-QPCR-F/ ACT7-QPCR-R, for *ACT7*) are listed in Table S1.  
627 Analyses were done with three independent experiments and technical duplicates  
628 were included in each case (n=2). The reference gene used in the qPCR analyses  
629 was *ACT7*.

630

## 631 **Chromatin Immunoprecipitation assays and *in silico* analyses**

632 ChIP assays were conducted from 14 day old Col-0, *hsi2 hsl1* and VAL1-HA  
633 transgenic (Questa et al., 2016) seedlings grown on 1X GM media following the  
634 protocol previously reported (Johnson et al., 2002) with minor modifications. Tissue  
635 was cross-linked in fixation buffer (0.4M sucrose, 10 mM Tris-HCl [pH 8], 1 mM  
636 EDTA, 1mM PMSF and 1% formaldehyde) under vacuum. Samples were  
637 resuspended in lysis buffer (50mM HEPES [pH 7.5], 150mM NaCl, 1mM EDTA, 1%  
638 Triton X-100, 0.1% deoxycholate, 0.1% SDS, 1 mM PMSF) and chromatin was  
639 sheared by sonication to approximately 500-100 bp fragments using the Bioruptor®  
640 sonicator (Diagenode, Belgium). Immunoprecipitation was done with the anti-  
641 H3K27me3 (Active-motif, Calsband, USA), anti-HA (Abcam, Cambridge, UK) or  
642 IgG antibodies (Invitrogen, USA). DNA-protein complexes were eluted from the  
643 Dynabeads (1% SDS and NaHCO<sub>3</sub> 0.1M) and the crosslink was reverted with 5M

644 NaCl. The RT-qPCR experiments were performed as previously described. The  
645 oligonucleotides used in these analyses were pABI4-RY1-Fw/ RY1 Chip qPCR Rv,  
646 pABI4-RY1RY2-Fw/ RY2 Chip qPCR Rv, ABI4-ChIP-F / ABI4-ChIP-R (Table S1).

647 For the analyses of the ChIP-seq, the raw data were downloaded from Gene  
648 Expression Omnibus under accession numbers GSE119715 and GSE159499  
649 (Yuan et al., 2021) and from Beijing Institute of Genomics Data Center, BioProject  
650 PRJCA002620 (Wang et al., 2020). Reads were aligned using Bowtie2 v2.3.4.3  
651 (Langmead and Salzberg, 2012) to the *Arabidopsis* genome (TAIR10). The  
652 resulting SAM file containing mapped reads were converted to BAM format, sorted,  
653 and indexed using Samtools v1.9 (Li et al., 2009). Duplicated reads were removed  
654 using Picard tools (Picard Toolkit, 2019). Only perfectly and uniquely mapped  
655 reads were retained for further analysis. To normalize and visualize the datasets,  
656 the BAM files were converted to bigwig using bamCoverage provided by  
657 deepTools v3.1.2 (Ramirez et al., 2014). Finally, the bigwig files were visualized in  
658 the Integrated Genome Browser (IGV).

659

## 660 **FUNDING**

661 This research was supported by CONACYT [CB 220534 and FCI 316070] and  
662 DGAPA-UNAM [IN207320 and IN208620] grants. AH and MU-A were supported by  
663 a PhD and KA postdoctoral fellowships from CONACYT.

664

## 665 **AUTHOR'S CONTRIBUTIONS**

666 PL, EC, MSM and AH designed the experiments; AH, EC, MSM, KAA, ADR and  
667 MU conducted the experiments; MU-A performed the bioinformatics analyses; MZ  
668 and PL analyzed the data; MZ and PL wrote/edited the paper. PL prepared figures.

669

## 670 **ACKNOWLEDGEMENTS**

671 We are very grateful to Drs. Caroline Dean (John Innes Center) for kindly sharing  
672 the VAL1-HA transgenic line and Allan Randy (Oklahoma State University) for  
673 sharing the *hsi2 hsl1* double mutant. We thank Dr. Jen Sheen, Dr. Gabriela  
674 Toledo-Ortíz and Dr. Josefát Gregorio for their comments and suggestions and Dr.

675 Kenneth Luehrsen for editorial suggestions. The IBT computer facility for access to  
676 the computer cluster. The authors declare no competing interests.

677

## 678 **Figure legends**

### 679 **Figure 1.- ABI4 and the LAFL transcription factors regulate the expression of**

680 **ABI4 during seed development.** A) Expression pattern of the 3kb *ABI4*:GUS

681 transgene monitored in wild-type (Wt) and *abi4* mutant embryos at preglobular (1),

682 globular (2), heart (3), torpedo (4), bent cotyledon (5), mature (6) dry seeds (7) and

683 24h germinating seedlings (8). A representative pattern for each line is shown. B)

684 Pattern of GUS expression in Wt, *lec1*, *fus3*, *abi3* and *lec2* mutant embryos at

685 preglobular (1), globular (2), heart (3), torpedo (4), bent cotyledon (5), mature (6)

686 developing seeds and dry seeds (7). The different expression patterns observed in

687 the *abi3* mutant are shown and the percentage (%) of each is included. Arrow

688 points to the suspensor tissue in the *lec1* mutant

689

### 690 **Figure 2. LEC2 is essential for the correct activation of ABI4 during early** 691 **seedling development and for glucose and ABA signaling responses.**

692 Representative expression of *3KABI4*:GUS germinating seedlings at 24 h (A, C, E

693 and G) and 72h (B, D, F and H) after transferred to germinating conditions for wild-

694 type (Wt), *abi3*, *lec1* and *lec2* mutants. (I) Analysis by RT-qPCR of *ABI4* transcript

695 levels from Wt, *abi3*, *lec1* and *lec2* mutant seedlings 24h after transference to

696 germinating conditions. Transcript level using five times more *lec2* cDNA (1:5) is

697 shown. Expression is reported relative to that of *Actin 7 (ACT7)*. Bars are means

698  $\pm$ SE of triplicate biological experiments (each with n=2 technical replicates) and

699 with P values  $p < 0.05$  between wild-type compared to the mutants (Student's t test).

700 Phenotypes of 14-day-old seedlings of Col-0 wild-type (Wt), *lec1*, *lec2* and *abi4*

701 seedlings grown in the presence of media with 7% glucose (Glc) (J) or 3  $\mu$ M ABA

702 (L). (K) Percentage (%) of seedlings with expanded green cotyledons in the

703 presence of 7% Glc (K) or 3  $\mu$ M ABA (M). Error bars represent the SD of biological

704 independent triplicate experiments.

705

706 **Figure 3. Analysis of the upstream regulatory region required for the *ABI4***  
707 **gene expression.** (A) Diagram of the upstream regulatory region of the *ABI4* gene  
708 showing the deletion fragments generated, marked in kb from the ATG. The  
709 location within the 3 kb upstream region of the two RY motifs and their  
710 corresponding sequences (yellow boxes), the putative G-box (blue box) and the  
711 CE element are indicated. Histochemical expression pattern of the GUS reporter in  
712 embryos at globular (B, G, L), heart (C, H, M), torpedo (D, I, N), bent cotyledon (E,  
713 J, O) and mature (F, K, P) stages and from siliques (Q, R, S), 14 day-old seedlings  
714 (T), rosette leaves (U) and flowers (V) tissues from representative transgenic lines  
715 expressing GUS from 3kb (*3KABI4*), 2.5 kb (*2.5KABI4*) and 2 kb (*2KABI4*)  
716 upstream sequences from the ATG of *ABI4*. The arrow points to maternal tissues.  
717 Scale bars: 500  $\mu$ m.

718  
719 **Figure 4. The RY motifs present in the regulatory region of *ABI4* are essential**  
720 **for the correct expression of the *ABI4* gene.** (A) Diagram of the upstream region  
721 of *ABI4* showing the mutations generated in the RY elements. The changes  
722 introduced in each mutant construct are indicated in red compared to the original  
723 sequence. Histochemical expression of seeds at globular and bent cotyledon  
724 stages or in 14 day-old seedlings, rosette leaves, siliques and flowers from  
725 transgenic representative lines expressing GUS from the 3kb *ABI4* upstream  
726 sequence containing the (B) original RY motifs (Wt) or the site-specific RY  
727 mutations in the (C) RY2 (mRY2), (D) RY1 (mRY1) and (E) the double RY1 RY2  
728 (mRY1 RY2) motifs.

729  
730 **Figure 5. *HSI2/VAL1 HSL1/VAL2* transcription factors are required for the**  
731 **correct repression of *ABI4*.** (A) Analysis by RT-qPCR of the *ABI4* transcript  
732 accumulation in wild-type (Wt) or the *hsi2 hsl1* loss-of-function double mutant 10  
733 day-old seedlings. *ABI4* expression is reported relative to that of *Actin7 (ACT7)*.  
734 Bars are means  $\pm$ SE of triplicate biological experiments (each with n=2 technical  
735 replicates). (B) Phenotypes of 10 day-old Col 0 wild-type (Wt) and *hsi2 hsl1* mutant  
736 seedlings grown in the presence of 3% glucose (Glc). (C) Phenotypes from 15 day-

737 old Col-0 wild-type (Wt), *hsi2 hsl1* and *abi4* mutants seedlings grown on GM media  
738 or (D) GM media in the presence of 0.5  $\mu$ M ABA.

739

740 **Figure 6. LEC2 and HIS/VAL factors bind to the *ABI4* upstream regulatory**  
741 **sequence.** ChIP-seq signal for the *ABI4* loci for the (A) LEC2-GR-3xFLAG (Wang  
742 et al., 2020) and for the (B) VAL1-GFP and SWN-GFP (Yuan et al., 2021) DNA  
743 binding factors. The binding peaks in each case were detected and compared to  
744 the corresponding negative control. The location of the *ABI4* coding region is  
745 indicated by the black box. In the upper box the sequence included in the peaks  
746 that is common to the LEC2 and VAL1 regulators is shown and the location of the  
747 two RY elements is highlighted in yellow. Chromatin immunoprecipitation (ChIP)  
748 of the VAL1-HA protein binding in 10-day-old Col-0 (Wt) (dark grey) and VAL1-HA  
749 (light gray) seedlings along the *ABI4*. The qPCR from the immunoprecipitated  
750 sample was done using the pABI4-RY1-Fw/ and RY1 Chip qPCR Rv (C) or the  
751 pABI4-RY1RY2-Fw/ RY2 Chip qPCR Rv (D) primer pairs covering around the RY1  
752 and RY2 elements. (E) Analysis by RT-qPCR of the *ABI4* transcript accumulation  
753 in wild-type (Wt) or the *val1* 10 day-old mutant seedlings. *ABI4* expression is  
754 reported relative to that of *Actin7* gene (*ACT7*). (F) ChIP analysis of the H3K27me3  
755 in 10-day-old Col-0 (Wt) (dark grey) and *hsi2 hsl1* mutant (light gray) seedlings.  
756 The qPCR from the immunoprecipitated sample was done using the ABI4-ChIP-F  
757 and ABI4-ChIP-R primer pair covering the transcription initiation site of *ABI4* (TSS)  
758 and the primers ABI4-558Fw and ABI4-784Rv in the body of the *ABI4* gene. The  
759 bars are the mean  $\pm$  SE of triplicate independent experiments (each with technical  
760 duplicates n = 2).

761

762 **Figure 7. Model of the regulation of the *ABI4* gene expression by the LEC2,**  
763 **ABI3, HIS/VAL and *ABI4* transcription factors.** (A) The initial *ABI4* transcription  
764 activation occurs early in the of the developing seed (proembryo stage) by the  
765 initial activation by LEC2 dimer interacting with the two RY elements. This  
766 activation is critical for *ABI4* transcription initiation, probably establishing a  
767 permissive chromatin conformation schematized by a lower nucleosome number

768 (grey cylinders) and no H3K27me3 mark. ABI3 binds to the same motifs, stabilizing  
769 LEC2 DNA as LEC2:ABI3 heterodimers or later by itself later once an open  
770 chromatin is established and the level of LEC2 decreases. The *de novo* translated  
771 ABI4 activates its expression during all developing seed stages. At these  
772 developmental stages the HSI/VAL repressors or the PRC2 complex do not  
773 interact with the *ABI4* locus due to the presence of LEC2 or ABI3. (B) During  
774 vegetative growth the absence of LEC2 and/or low ABI3 level together with the  
775 accumulation of HSI/VAL repressors allows these proteins to interact with the RY  
776 elements in the *ABI4* locus. This interaction results in the accumulation of the  
777 PRC2 complex and probably the increase in the nucleosome number (grey  
778 cylinders) and the H3K27me3 mark; the transcriptional activity of the *ABI4*  
779 decreases and consequently the gene is silenced.

780

781 **Supplemental Figure 1. Expression of *pABI4:GUS* in germinating seedlings.**

782 GUS activity of *pABI4:GUS* transgene in the segregating heterozygous *lec2* (+/-)  
783 germinating seedlings. GUS activity was detected in three out of four heterozygous  
784 segregating plants.

785 **Supplemental Figure 2. *abi3* mutant displays a glucose- and ABA-insensitive**

786 **seedling phenotype.** Phenotype of 10 day-old seedlings of Col-0 wild-type (Wt),  
787 *abi3* and *abi4* mutants in the presence of media containing 7% glucose (A) or 3μM  
788 ABA (B).

789 **Supplemental Figure 3. Expression of *pABI4:GUS* in germinating seedlings.**

790 GUS histochemical activity in 14-day-old seedlings from independent transgenic  
791 lines carrying 3 kb, 2.5 kb and 2 kb of the *ABI4* regulatory region fused to the GUS  
792 reporter gene.

793 **Supplemental Figure 4. Expression of *pABI4:GUS* carrying mutation in the**

794 **RY elements.** GUS histochemical activity in 14-day-old seedlings from  
795 independent transgenic lines carrying mutations in the RY1 (mRY1), RY2 (mRY2)  
796 and the double mRY1 and RY2 (mRY1 RY2) elements in the *ABI4* regulatory  
797 region fused to the GUS reporter.



## Parsed Citations

- Abraham, Z., Iglesias-Fernandez, R., Martinez, M., Rubio-Somoza, I., Diaz, I., Carbonero, P., and Vicente-Carbajosa, J. (2016). A Developmental Switch of Gene Expression in the Barley Seed Mediated by HvVP1 (Viviparous-1) and HvGAMYB Interactions. *Plant Physiol* 170, 2146-2158.  
Google Scholar: [Author Only](#) [Title Only](#) [Author and Title](#)
- Acevedo-Hernandez, G.J., Leon, P., and Herrera-Estrella, L.R. (2005). Sugar and ABA responsiveness of a minimal RBCS light-responsive unit is mediated by direct binding of ABI4. *Plant J* 43, 506-519.  
Google Scholar: [Author Only](#) [Title Only](#) [Author and Title](#)
- Arenas-Huerta, F., Arroyo, A., Zhou, L., Sheen, J., and Leon, P. (2000). Analysis of Arabidopsis glucose insensitive mutants, gin5 and gin6, reveals a central role of the plant hormone ABA in the regulation of plant vegetative development by sugar. *Genes Dev* 14, 2085-2096.  
Google Scholar: [Author Only](#) [Title Only](#) [Author and Title](#)
- Arroyo, A., Bossi, F., Finkelstein, R.R., and Leon, P. (2003). Three genes that affect sugar sensing (abscisic acid insensitive 4, abscisic acid insensitive 5, and constitutive triple response 1) are differentially regulated by glucose in Arabidopsis. *Plant Physiol* 133, 231-242.  
Google Scholar: [Author Only](#) [Title Only](#) [Author and Title](#)
- Atanassov, I., Atanassov, I., Etschells, J.P., and Turner, S.R. (2009). A simple, flexible and efficient PCR-fusion/Gateway cloning procedure for gene fusion, site-directed mutagenesis, short sequence insertion and domain deletions and swaps. *Plant Methods* 5, 14.  
Google Scholar: [Author Only](#) [Title Only](#) [Author and Title](#)
- Barros-Galvao, T., Dave, A., Gilday, A.D., Harvey, D., Vaistij, F.E., and Graham, I.A. (2020). ABA INSENSITIVE4 promotes rather than represses PHYA-dependent seed germination in Arabidopsis thaliana. *New Phytol* 226, 953-956.  
Google Scholar: [Author Only](#) [Title Only](#) [Author and Title](#)
- Baud, S., Kelemen, Z., Thevenin, J., Boulard, C., Blanchet, S., To, A., Payre, M., Berger, N., Effroy-Cuzzi, D., Franco-Zorrilla, J.M., Godoy, M., Solano, R., Thevenon, E., Parcy, F., Lepiniec, L., and Dubreucq, B. (2016). Deciphering the Molecular Mechanisms Underpinning the Transcriptional Control of Gene Expression by Master Transcriptional Regulators in Arabidopsis Seed. *Plant Physiol* 171, 1099-1112.  
Google Scholar: [Author Only](#) [Title Only](#) [Author and Title](#)
- Bossi, F., Cordoba, E., Dupre, P., Mendoza, M.S., Roman, C.S., and Leon, P. (2009). The Arabidopsis ABA-INSENSITIVE (ABI) 4 factor acts as a central transcription activator of the expression of its own gene, and for the induction of ABI5 and SBE2.2 genes during sugar signaling. *Plant J* 59, 359-374.  
Google Scholar: [Author Only](#) [Title Only](#) [Author and Title](#)
- Boulard, C., Fatihi, A., Lepiniec, L., and Dubreucq, B. (2017). Regulation and evolution of the interaction of the seed B3 transcription factors with NF-Y subunits. *Biochim Biophys Acta Gene Regul Mech* 1860, 1069-1078.  
Google Scholar: [Author Only](#) [Title Only](#) [Author and Title](#)
- Boulard, C., Thevenin, J., Tranquet, O., Laporte, V., Lepiniec, L., and Dubreucq, B. (2018). LEC1 (NF-YB9) directly interacts with LEC2 to control gene expression in seed. *Biochim Biophys Acta Gene Regul Mech* 1861, 443-450.  
Google Scholar: [Author Only](#) [Title Only](#) [Author and Title](#)
- Braybrook, S.A., Stone, S.L., Park, S., Bui, A.Q., Le, B.H., Fischer, R.L., Goldberg, R.B., and Harada, J.J. (2006). Genes directly regulated by LEAFY COTYLEDON2 provide insight into the control of embryo maturation and somatic embryogenesis. *Proc Natl Acad Sci U S A* 103, 3468-3473.  
Google Scholar: [Author Only](#) [Title Only](#) [Author and Title](#)
- Brocard-Gifford, I.M., Lynch, T.J., and Finkelstein, R.R. (2003). Regulatory networks in seeds integrating developmental, abscisic acid, sugar, and light signaling. *Plant Physiol* 131, 78-92.  
Google Scholar: [Author Only](#) [Title Only](#) [Author and Title](#)
- Chandrasekaran, U., Luo, X., Zhou, W., and Shu, K. (2020). Multifaceted Signaling Networks Mediated by Abscisic Acid Insensitive 4. *Plant Commun* 1, 100040.  
Google Scholar: [Author Only](#) [Title Only](#) [Author and Title](#)
- Chen, N., Wang, H., Abdelmageed, H., Veerappan, V., Tadege, M., and Allen, R.D. (2020). HSI2/VAL1 and HSL1/VAL2 function redundantly to repress DOG1 expression in Arabidopsis seeds and seedlings. *New Phytol* 227, 840-856.  
Google Scholar: [Author Only](#) [Title Only](#) [Author and Title](#)
- Clough, S.J., and Bent, A.F. (1998). Floral dip: a simplified method for Agrobacterium-mediated transformation of Arabidopsis thaliana. *Plant J* 16, 735-743.  
Google Scholar: [Author Only](#) [Title Only](#) [Author and Title](#)
- Cui, H., Hao, Y., and Kong, D. (2012). SCARECROW has a SHORT-ROOT-independent role in modulating the sugar response. *Plant Physiol* 158, 1769-1778.  
Google Scholar: [Author Only](#) [Title Only](#) [Author and Title](#)

- Dekkers, B.J., Schuurmans, J.A., and Smeekens, S.C. (2008). Interaction between sugar and abscisic acid signalling during early seedling development in *Arabidopsis*. *Plant Mol Biol* 67, 151-167.  
Google Scholar: [Author Only Title Only Author and Title](#)
- Dong, Z, Yu, Y., Li, S., Wang, J., Tang, S., and Huang, R. (2016). Abscisic Acid Antagonizes Ethylene Production through the ABI4-Mediated Transcriptional Repression of ACS4 and ACS8 in *Arabidopsis*. *Mol Plant* 9, 126-135.  
Google Scholar: [Author Only Title Only Author and Title](#)
- Eisner, N., Maymon, T., Sanchez, E.C., Bar-Zvi, D., Brodsky, S., Finkelstein, R., and Bar-Zvi, D. (2021). Phosphorylation of Serine 114 of the transcription factor ABSCISIC ACID INSENSITIVE 4 is essential for activity. *Plant Sci* 305, 110847.  
Google Scholar: [Author Only Title Only Author and Title](#)
- Feng, C.Z, Chen, Y., Wang, C., Kong, Y.H., Wu, W.H., and Chen, Y.F. (2014). *Arabidopsis* RAW1 transcription factor, phosphorylated by SnRK2 kinases, regulates the expression of ABI3, ABI4, and ABI5 during seed germination and early seedling development. *Plant J* 80, 654-668.  
Google Scholar: [Author Only Title Only Author and Title](#)
- Finkelstein, R., Lynch, T., Reeves, W., Petitfils, M., and Mostachetti, M. (2011). Accumulation of the transcription factor ABA-insensitive (ABI)4 is tightly regulated post-transcriptionally. *J Exp Bot* 62, 3971-3979.  
Google Scholar: [Author Only Title Only Author and Title](#)
- Finkelstein, R.R. (1994). Mutations at two new *Arabidopsis* ABA response loci are similar to the *abi3* mutations. *Plant J.* 5, 765-771.  
Google Scholar: [Author Only Title Only Author and Title](#)
- Giraud, E., Van Aken, O., Ho, L.H., and Whelan, J. (2009). The transcription factor ABI4 is a regulator of mitochondrial retrograde expression of ALTERNATIVE OXIDASE1a. *Plant Physiol* 150, 1286-1296.  
Google Scholar: [Author Only Title Only Author and Title](#)
- Gregorio, J., Hernandez-Bernal, A.F., Cordoba, E., and Leon, P. (2014). Characterization of evolutionarily conserved motifs involved in activity and regulation of the ABA-INSENSITIVE (ABI) 4 transcription factor. *Mol Plant* 7, 422-436.  
Google Scholar: [Author Only Title Only Author and Title](#)
- Huang, X., Zhang, X., Gong, Z., Yang, S., and Shi, Y. (2016a). ABI4 represses the expression of type-AARRs to inhibit seed germination in *Arabidopsis*. *Plant J.*  
Google Scholar: [Author Only Title Only Author and Title](#)
- Huang, X., Zhang, X., Gong, Z., Yang, S., and Shi, Y. (2017). ABI4 represses the expression of type-AARRs to inhibit seed germination in *Arabidopsis*. *Plant J* 89, 354-365.  
Google Scholar: [Author Only Title Only Author and Title](#)
- Huang, Y., Feng, C.Z, Ye, Q., Wu, W.H., and Chen, Y.F. (2016b). *Arabidopsis* WRKY6 Transcription Factor Acts as a Positive Regulator of Abscisic Acid Signaling during Seed Germination and Early Seedling Development. *PLoS Genet* 12, e1005833.  
Google Scholar: [Author Only Title Only Author and Title](#)
- Huijser, C., Kortstee, A., Pego, J., Weisbeek, P., Wisman, E., and Smeekens, S. (2000). The *Arabidopsis* SUCROSE UNCOUPLED-6 gene is identical to ABSCISIC ACID INSENSITIVE-4: involvement of abscisic acid in sugar responses. *Plant J* 23, 577-585.  
Google Scholar: [Author Only Title Only Author and Title](#)
- Jefferson, R.A (1987). Assaying chimeric genes in plants: the GUS gene fusion system. *Plant Mol. Biol. Report* 5, 387-405.  
Google Scholar: [Author Only Title Only Author and Title](#)
- Jia, H., Suzuki, M., and McCarty, D.R. (2014). Regulation of the seed to seedling developmental phase transition by the LAFL and VAL transcription factor networks. *Wiley Interdiscip Rev Dev Biol* 3, 135-145.  
Google Scholar: [Author Only Title Only Author and Title](#)
- Johnson, L., Cao, X., and Jacobsen, S. (2002). Interplay between two epigenetic marks. DNA methylation and histone H3 lysine 9 methylation. *Curr Biol* 12, 1360-1367.  
Google Scholar: [Author Only Title Only Author and Title](#)
- Kerchev, P.I., Pellny, T.K., Vivancos, P.D., Kiddle, G., Hedden, P., Driscoll, S., Vanacker, H., Verrier, P., Hancock, R.D., and Foyer, C.H. (2011). The transcription factor ABI4 is required for the ascorbic acid-dependent regulation of growth and regulation of jasmonate-dependent defense signaling pathways in *Arabidopsis*. *Plant Cell* 23, 3319-3334.  
Google Scholar: [Author Only Title Only Author and Title](#)
- Koussevitzky, S., Nott, A., Mockler, T.C., Hong, F., Sachetto-Martins, G., Surpin, M., Lim, J., Mittler, R., and Chory, J. (2007). Signals from chloroplasts converge to regulate nuclear gene expression. *Science* 316, 715-719.  
Google Scholar: [Author Only Title Only Author and Title](#)
- Langmead, B., and Salzberg, S.L. (2012). Fast gapped-read alignment with Bowtie 2. *Nat Methods* 9, 357-359.  
Google Scholar: [Author Only Title Only Author and Title](#)
- Le, B.H., Cheng, C., Bui, A.Q., Wagmaister, J.A., Henry, K.F., Pelletier, J., Kwong, L., Belmonte, M., Kirkbride, R., Horvath, S., Drews, G.N., Fischer, R.L., Okamoto, J.K., Harada, J.J., and Goldberg, R.B. (2010). Global analysis of gene activity during *Arabidopsis* seed development and identification of seed-specific transcription factors. *Proc Natl Acad Sci U S A* 107, 8063-8070.

Google Scholar: [Author Only](#) [Title Only](#) [Author and Title](#)

Lee, K., Lee, H.G., Yoon, S., Kim, H.U., and Seo, P.J. (2015). The Arabidopsis MYB96 Transcription Factor Is a Positive Regulator of ABSCISIC ACID-INSENSITIVE4 in the Control of Seed Germination. *Plant Physiol* 168, 677-689.

Google Scholar: [Author Only](#) [Title Only](#) [Author and Title](#)

Lepiniec, L., Devic, M., Roscoe, T.J., Bouyer, D., Zhou, D.X., Boulard, C., Baud, S., and Dubreucq, B. (2018). Molecular and epigenetic regulations and functions of the LAF1 transcriptional regulators that control seed development. *Plant Reprod* 31, 291-307.

Google Scholar: [Author Only](#) [Title Only](#) [Author and Title](#)

Li, H., Handsaker, B., Wysoker, A., Fennell, T., Ruan, J., Homer, N., Marth, G., Abecasis, G., Durbin, R., and Genome Project Data Processing, S. (2009). The Sequence Alignment/Map format and SAMtools. *Bioinformatics* 25, 2078-2079.

Google Scholar: [Author Only](#) [Title Only](#) [Author and Title](#)

Lotan, T., Ohto, M., Yee, K.M., West, M.A., Lo, R., Kwong, R.W., Yamagishi, K., Fischer, R.L., Goldberg, R.B., and Harada, J.J. (1998). Arabidopsis LEAFY COTYLEDON1 is sufficient to induce embryo development in vegetative cells. *Cell* 93, 1195-1205.

Google Scholar: [Author Only](#) [Title Only](#) [Author and Title](#)

Malamy, J.E., and Benfey, P.N. (1997). Analysis of SCARECROW expression using a rapid system for assessing transgene expression in Arabidopsis roots. *Plant J* 12, 957-963.

Google Scholar: [Author Only](#) [Title Only](#) [Author and Title](#)

Meinke, D.W., Franzmann, L.H., Nickle, T.C., and Yeung, E.C. (1994). Leafy Cotyledon Mutants of Arabidopsis. *Plant Cell* 6, 1049-1064.

Google Scholar: [Author Only](#) [Title Only](#) [Author and Title](#)

Nie, Z., Guo, C., Das, S.K., Chow, C.C., Batchelor, E., Simons, S.S.J., and Levens, D. (2020). Dissecting transcriptional amplification by MYC. *Elife* 9.

Google Scholar: [Author Only](#) [Title Only](#) [Author and Title](#)

Niu, X., Helentjaris, T., and Bate, N.J. (2002). Maize ABI4 binds coupling element1 in abscisic acid and sugar response genes. *Plant Cell* 14, 2565-2575.

Google Scholar: [Author Only](#) [Title Only](#) [Author and Title](#)

Ogas, J., Kaufmann, S., Henderson, J., and Somerville, C. (1999). PICKLE is a CHD3 chromatin-remodeling factor that regulates the transition from embryonic to vegetative development in Arabidopsis. *Proc Natl Acad Sci U S A* 96, 13839-13844.

Google Scholar: [Author Only](#) [Title Only](#) [Author and Title](#)

Parcy, F., Valon, C., Kohara, A., Misera, S., and Giraudat, J. (1997). The ABSCISIC ACID-INSENSITIVE3, FUSCA3, and LEAFY COTYLEDON1 loci act in concert to control multiple aspects of Arabidopsis seed development. *Plant Cell* 9, 1265-1277.

Google Scholar: [Author Only](#) [Title Only](#) [Author and Title](#)

Penfield, S., Li, Y., Gilday, A.D., Graham, S., and Graham, I.A. (2006). Arabidopsis ABA INSENSITIVE4 regulates lipid mobilization in the embryo and reveals repression of seed germination by the endosperm. *Plant Cell* 18, 1887-1899.

Google Scholar: [Author Only](#) [Title Only](#) [Author and Title](#)

Quesada, V., Ponce, M.R., and Micol, J.L. (2000). Genetic analysis of salt-tolerant in Arabidopsis thaliana. *Genetics* 154, 421-436.

Google Scholar: [Author Only](#) [Title Only](#) [Author and Title](#)

Questa, J.I., Song, J., Geraldo, N., An, H., and Dean, C. (2016). Arabidopsis transcriptional repressor VAL1 triggers Polycomb silencing at FLC during vernalization. *Science* 353, 485-488.

Google Scholar: [Author Only](#) [Title Only](#) [Author and Title](#)

Ramirez, F., Dundar, F., Diehl, S., Gruning, B.A., and Manke, T. (2014). deepTools: a flexible platform for exploring deep-sequencing data. *Nucleic Acids Res* 42, W187-191.

Google Scholar: [Author Only](#) [Title Only](#) [Author and Title](#)

Rook, F., Corke, F., Card, R., Munz, G., Smith, C., and Bevan, M.W. (2001). Impaired sucrose-induction mutants reveal the modulation of sugar-induced starch biosynthetic gene expression by abscisic acid signalling. *Plant J* 26, 421-433.

Google Scholar: [Author Only](#) [Title Only](#) [Author and Title](#)

Santos-Mendoza, M., Dubreucq, B., Baud, S., Parcy, F., Caboche, M., and Lepiniec, L. (2008). Deciphering gene regulatory networks that control seed development and maturation in Arabidopsis. *Plant J* 54, 608-620.

Google Scholar: [Author Only](#) [Title Only](#) [Author and Title](#)

Shang, Y., Yan, L., Liu, Z.Q., Cao, Z., Mei, C., Xin, Q., Wu, F.Q., Wang, X.F., Du, S.Y., Jiang, T., Zhang, X.F., Zhao, R., Sun, H.L., Liu, R., Yu, Y.T., and Zhang, D.P. (2010). The Mg-chelatase H subunit of Arabidopsis antagonizes a group of WRKY transcription repressors to relieve ABA-responsive genes of inhibition. *Plant Cell* 22, 1909-1935.

Google Scholar: [Author Only](#) [Title Only](#) [Author and Title](#)

Shkolnik-Inbar, D., and Bar-Zvi, D. (2010). ABI4 mediates abscisic acid and cytokinin inhibition of lateral root formation by reducing polar auxin transport in Arabidopsis. *Plant Cell* 22, 3560-3573.

Google Scholar: [Author Only](#) [Title Only](#) [Author and Title](#)

Shkolnik-Inbar, D., and Bar-Zvi, D. (2011). Expression of ABSCISIC ACID INSENSITIVE 4 (ABI4) in developing Arabidopsis seedlings.

**Plant signaling & behavior 6, 694-696.**

Google Scholar: [Author Only](#) [Title Only](#) [Author and Title](#)

**Shu, K., Chen, Q., Wu, Y., Liu, R., Zhang, H., Wang, S., Tang, S., Yang, W., and Xie, Q. (2016a). ABSCISIC ACID-INSENSITIVE 4 negatively regulates flowering through directly promoting Arabidopsis FLOWERING LOCUS C transcription. J Exp Bot 67, 195-205.**

Google Scholar: [Author Only](#) [Title Only](#) [Author and Title](#)

**Shu, K., Zhang, H., Wang, S., Chen, M., Wu, Y., Tang, S., Liu, C., Feng, Y., Cao, X., and Xie, Q. (2013). ABI4 regulates primary seed dormancy by regulating the biogenesis of abscisic acid and gibberellins in arabidopsis. PLoS Genet 9, e1003577.**

Google Scholar: [Author Only](#) [Title Only](#) [Author and Title](#)

**Shu, K., Chen, Q., Wu, Y., Liu, R., Zhang, H., Wang, P., Li, Y., Wang, S., Tang, S., Liu, C., Yang, W., Cao, X., Serino, G., and Xie, Q. (2016b). ABI4 mediates antagonistic effects of abscisic acid and gibberellins at transcript and protein levels. Plant J 85, 348-361.**

Google Scholar: [Author Only](#) [Title Only](#) [Author and Title](#)

**Signora, L., De Smet, I., Foyer, C.H., and Zhang, H. (2001). ABA plays a central role in mediating the regulatory effects of nitrate on root branching in Arabidopsis. Plant J 28, 655-662.**

Google Scholar: [Author Only](#) [Title Only](#) [Author and Title](#)

**Soderman, E.M., Brocard, I.M., Lynch, T.J., and Finkelstein, R.R. (2000). Regulation and function of the Arabidopsis ABA-insensitive4 gene in seed and abscisic acid response signaling networks. Plant Physiol 124, 1752-1765.**

Google Scholar: [Author Only](#) [Title Only](#) [Author and Title](#)

**Stone, S.L., Kwong, L.W., Yee, K.M., Pelletier, J., Lepiniec, L., Fischer, R.L., Goldberg, R.B., and Harada, J.J. (2001). LEAFY COTYLEDON2 encodes a B3 domain transcription factor that induces embryo development. Proc Natl Acad Sci U S A 98, 11806-11811.**

Google Scholar: [Author Only](#) [Title Only](#) [Author and Title](#)

**Stone, S.L., Braybrook, S.A., Paula, S.L., Kwong, L.W., Meuser, J., Pelletier, J., Hsieh, T.F., Fischer, R.L., Goldberg, R.B., and Harada, J.J. (2008). Arabidopsis LEAFY COTYLEDON2 induces maturation traits and auxin activity: Implications for somatic embryogenesis. Proc Natl Acad Sci U S A 105, 3151-3156.**

Google Scholar: [Author Only](#) [Title Only](#) [Author and Title](#)

**Sun, X., Feng, P., Xu, X., Guo, H., Ma, J., Chi, W., Lin, R., Lu, C., and Zhang, L. (2011). A chloroplast envelope-bound PHD transcription factor mediates chloroplast signals to the nucleus. Nat Commun 2, 477.**

Google Scholar: [Author Only](#) [Title Only](#) [Author and Title](#)

**Suzuki, M., Wang, H.H., and McCarty, D.R. (2007). Repression of the LEAFY COTYLEDON 1/B3 regulatory network in plant embryo development by VP1/ABSCISIC ACID INSENSITIVE 3-LIKE B3 genes. Plant Physiol 143, 902-911.**

Google Scholar: [Author Only](#) [Title Only](#) [Author and Title](#)

**Swaminathan, K., Peterson, K., and Jack, T. (2008). The plant B3 superfamily. Trends Plant Sci 13, 647-655.**

Google Scholar: [Author Only](#) [Title Only](#) [Author and Title](#)

**Tang, L.P., Zhou, C., Wang, S.S., Yuan, J., Zhang, X.S., and Su, Y.H. (2017). FUSCA3 interacting with LEAFY COTYLEDON2 controls lateral root formation through regulating YUCCA4 gene expression in Arabidopsis thaliana. New Phytol 213, 1740-1754.**

Google Scholar: [Author Only](#) [Title Only](#) [Author and Title](#)

**Tao, Z., Shen, L., Gu, X., Wang, Y., Yu, H., and He, Y. (2017). Embryonic epigenetic reprogramming by a pioneer transcription factor in plants. Nature 551, 124-128.**

Google Scholar: [Author Only](#) [Title Only](#) [Author and Title](#)

**Tao, Z., Hu, H., Luo, X., Jia, B., Du, J., and He, Y. (2019). Embryonic resetting of the parental vernalized state by two B3 domain transcription factors in Arabidopsis. Nat Plants 5, 424-435.**

Google Scholar: [Author Only](#) [Title Only](#) [Author and Title](#)

**Tian, R., Wang, F., Zheng, Q., Niza, V., Downie, A.B., and Perry, S.E. (2020). Direct and indirect targets of the arabidopsis seed transcription factor ABSCISIC ACID INSENSITIVE3. Plant J.**

Google Scholar: [Author Only](#) [Title Only](#) [Author and Title](#)

**To, A., Valon, C., Savino, G., Guillemot, J., Devic, M., Giraudat, J., and Parcy, F. (2006). A network of local and redundant gene regulation governs Arabidopsis seed maturation. Plant Cell 18, 1642-1651.**

Google Scholar: [Author Only](#) [Title Only](#) [Author and Title](#)

**Tsakagoshi, H., Morikami, A., and Nakamura, K. (2007). Two B3 domain transcriptional repressors prevent sugar-inducible expression of seed maturation genes in Arabidopsis seedlings. Proc Natl Acad Sci U S A 104, 2543-2547.**

Google Scholar: [Author Only](#) [Title Only](#) [Author and Title](#)

**Veerappan, V., Chen, N., Reichert, A.I., and Allen, R.D. (2014). HSI2/VAL1 PHD-like domain promotes H3K27 trimethylation to repress the expression of seed maturation genes and complex transgenes in Arabidopsis seedlings. BMC Plant Biol 14, 293.**

Google Scholar: [Author Only](#) [Title Only](#) [Author and Title](#)

**Veerappan, V., Wang, J., Kang, M., Lee, J., Tang, Y., Jha, A.K., Shi, H., Palanivelu, R., and Allen, R.D. (2012). A novel HSI2 mutation in Arabidopsis affects the PHD-like domain and leads to derepression of seed-specific gene expression. Planta 236, 1-17.**

Google Scholar: [Author Only](#) [Title Only](#) [Author and Title](#)

Wang, F., and Perry, S.E. (2013). Identification of direct targets of FUSCA3, a key regulator of Arabidopsis seed development. *Plant Physiol* 161, 1251-1264.

Google Scholar: [Author Only](#) [Title Only](#) [Author and Title](#)

Wang, F.X., Shang, G.D., Wu, L.Y., Xu, Z.G., Zhao, X.Y., and Wang, J.W. (2020). Chromatin Accessibility Dynamics and a Hierarchical Transcriptional Regulatory Network Structure for Plant Somatic Embryogenesis. *Dev Cell* 54, 742-757 e748.

Google Scholar: [Author Only](#) [Title Only](#) [Author and Title](#)

Wind, J.J., Peviani, A., Snel, B., Hanson, J., and Smeeckens, S.C. (2013). ABI4: versatile activator and repressor. *Trends Plant Sci* 18, 125-132.

Google Scholar: [Author Only](#) [Title Only](#) [Author and Title](#)

Yang, Y., Yu, X., Song, L., and An, C. (2011). ABI4 activates DGAT1 expression in Arabidopsis seedlings during nitrogen deficiency. *Plant Physiol* 156, 873-883.

Google Scholar: [Author Only](#) [Title Only](#) [Author and Title](#)

Yu, Y., Wang, J., Li, S., Kakan, X., Zhou, Y., Miao, Y., Wang, F., Qin, H., and Huang, R. (2019). Ascorbic Acid Integrates the Antagonistic Modulation of Ethylene and Abscisic Acid in the Accumulation of Reactive Oxygen Species. *Plant Physiol* 179, 1861-1875.

Google Scholar: [Author Only](#) [Title Only](#) [Author and Title](#)

Yuan, L., Song, X., Zhang, L., Yu, Y., Liang, Z., Lei, Y., Ruan, J., Tan, B., Liu, J., and Li, C. (2021). The transcriptional repressors VAL1 and VAL2 recruit PRC2 for genome-wide Polycomb silencing in Arabidopsis. *Nucleic Acids Res* 49, 98-113.

Google Scholar: [Author Only](#) [Title Only](#) [Author and Title](#)

Zaret, K.S. (2018). Pioneering the chromatin landscape. *Nat Genet* 50, 167-169.

Google Scholar: [Author Only](#) [Title Only](#) [Author and Title](#)

Zhao, Y., Ai, X., Wang, M., Xiao, L., and Xia, G. (2016). A putative pyruvate transporter TaBASS2 positively regulates salinity tolerance in wheat via modulation of ABI4 expression. *BMC Plant Biol* 16, 109.

Google Scholar: [Author Only](#) [Title Only](#) [Author and Title](#)

Zhou, M., Zhang, J., Shen, J., Zhou, H., Zhao, D., Gotor, C., Romero, L.C., Fu, L., Li, Z., Yang, J., Shen, W., Yuan, X., and Xie, Y. (2021). Hydrogen sulfide-linked persulfidation of ABI4 controls ABA responses through the transactivation of MAPKKK18 in Arabidopsis. *Mol Plant* 14, 921-936.

Google Scholar: [Author Only](#) [Title Only](#) [Author and Title](#)
